# Supplementary material for: Contribution of the TCRβ Repertoire to Marek’s Disease Genetic Resistance in the Chicken
Source: Viruses. 2023 Feb 22;15(3):607. doi: 10.3390/v15030607 (PMC10055752; doi:10.3390/v15030607)
Supplement: Supplementary file 1 [file viruses-15-00607-s001.zip › viruses-2070964-supplementary/supplementary data file S1.xlsx]

## Sheet: dna_haplotypes_3bp_window_line6
##fileformat=VCFv4.1
##fileDate=20181009
##source=freeBayes v1.0.2
##reference=tcr_vb1_example.fa
##phasing=none
##commandline="freebayes -f tcr_vb1_example.fa -F 0.01 -C 2 --pooled-continuous realigned_sorted_igv_6_vb1.bam"
##INFO=<ID=NS,Number=1,Type=Integer,Description="Number of samples with data">
##INFO=<ID=DP,Number=1,Type=Integer,Description="Total read depth at the locus">
##INFO=<ID=DPB,Number=1,Type=Float,Description="Total read depth per bp at the locus; bases in reads overlapping / bases in haplotype">
##INFO=<ID=AC,Number=A,Type=Integer,Description="Total number of alternate alleles in called genotypes">
##INFO=<ID=AN,Number=1,Type=Integer,Description="Total number of alleles in called genotypes">
##INFO=<ID=AF,Number=A,Type=Float,Description="Estimated allele frequency in the range (0,1]">
##INFO=<ID=RO,Number=1,Type=Integer,Description="Reference allele observation count, with partial observations recorded fractionally">
##INFO=<ID=AO,Number=A,Type=Integer,Description="Alternate allele observations, with partial observations recorded fractionally">
##INFO=<ID=PRO,Number=1,Type=Float,Description="Reference allele observation count, with partial observations recorded fractionally">
##INFO=<ID=PAO,Number=A,Type=Float,Description="Alternate allele observations, with partial observations recorded fractionally">
##INFO=<ID=QR,Number=1,Type=Integer,Description="Reference allele quality sum in phred">
##INFO=<ID=QA,Number=A,Type=Integer,Description="Alternate allele quality sum in phred">
##INFO=<ID=PQR,Number=1,Type=Float,Description="Reference allele quality sum in phred for partial observations">
##INFO=<ID=PQA,Number=A,Type=Float,Description="Alternate allele quality sum in phred for partial observations">
##INFO=<ID=SRF,Number=1,Type=Integer,Description="Number of reference observations on the forward strand">
##INFO=<ID=SRR,Number=1,Type=Integer,Description="Number of reference observations on the reverse strand">
##INFO=<ID=SAF,Number=A,Type=Integer,Description="Number of alternate observations on the forward strand">
##INFO=<ID=SAR,Number=A,Type=Integer,Description="Number of alternate observations on the reverse strand">
##INFO=<ID=SRP,Number=1,Type=Float,Description="Strand balance probability for the reference allele: Phred-scaled upper-bounds estimate of the probability of observing the deviation between SRF and SRR given E(SRF/SRR) ~ 0.5, derived using Hoeffding's inequality">
##INFO=<ID=SAP,Number=A,Type=Float,Description="Strand balance probability for the alternate allele: Phred-scaled upper-bounds estimate of the probability of observing the deviation between SAF and SAR given E(SAF/SAR) ~ 0.5, derived using Hoeffding's inequality">
##INFO=<ID=AB,Number=A,Type=Float,Description="Allele balance at heterozygous sites: a number between 0 and 1 representing the ratio of reads showing the reference allele to all reads, considering only reads from individuals called as heterozygous">
##INFO=<ID=ABP,Number=A,Type=Float,Description="Allele balance probability at heterozygous sites: Phred-scaled upper-bounds estimate of the probability of observing the deviation between ABR and ABA given E(ABR/ABA) ~ 0.5, derived using Hoeffding's inequality">
##INFO=<ID=RUN,Number=A,Type=Integer,Description="Run length: the number of consecutive repeats of the alternate allele in the reference genome">
##INFO=<ID=RPP,Number=A,Type=Float,Description="Read Placement Probability: Phred-scaled upper-bounds estimate of the probability of observing the deviation between RPL and RPR given E(RPL/RPR) ~ 0.5, derived using Hoeffding's inequality">
##INFO=<ID=RPPR,Number=1,Type=Float,Description="Read Placement Probability for reference observations: Phred-scaled upper-bounds estimate of the probability of observing the deviation between RPL and RPR given E(RPL/RPR) ~ 0.5, derived using Hoeffding's inequality">
##INFO=<ID=RPL,Number=A,Type=Float,Description="Reads Placed Left: number of reads supporting the alternate balanced to the left (5') of the alternate allele">
##INFO=<ID=RPR,Number=A,Type=Float,Description="Reads Placed Right: number of reads supporting the alternate balanced to the right (3') of the alternate allele">
##INFO=<ID=EPP,Number=A,Type=Float,Description="End Placement Probability: Phred-scaled upper-bounds estimate of the probability of observing the deviation between EL and ER given E(EL/ER) ~ 0.5, derived using Hoeffding's inequality">
##INFO=<ID=EPPR,Number=1,Type=Float,Description="End Placement Probability for reference observations: Phred-scaled upper-bounds estimate of the probability of observing the deviation between EL and ER given E(EL/ER) ~ 0.5, derived using Hoeffding's inequality">
##INFO=<ID=DPRA,Number=A,Type=Float,Description="Alternate allele depth ratio. Ratio between depth in samples with each called alternate allele and those without.">
##INFO=<ID=ODDS,Number=1,Type=Float,Description="The log odds ratio of the best genotype combination to the second-best.">
##INFO=<ID=GTI,Number=1,Type=Integer,Description="Number of genotyping iterations required to reach convergence or bailout.">
##INFO=<ID=TYPE,Number=A,Type=String,Description="The type of allele, either snp, mnp, ins, del, or complex.">
##INFO=<ID=CIGAR,Number=A,Type=String,Description="The extended CIGAR representation of each alternate allele, with the exception that '=' is replaced by 'M' to ease VCF parsing. Note that INDEL alleles do not have the first matched base (which is provided by default, per the spec) referred to by the CIGAR.">
##INFO=<ID=NUMALT,Number=1,Type=Integer,Description="Number of unique non-reference alleles in called genotypes at this position.">
##INFO=<ID=MEANALT,Number=A,Type=Float,Description="Mean number of unique non-reference allele observations per sample with the corresponding alternate alleles.">
##INFO=<ID=LEN,Number=A,Type=Integer,Description="allele length">
##INFO=<ID=MQM,Number=A,Type=Float,Description="Mean mapping quality of observed alternate alleles">
##INFO=<ID=MQMR,Number=1,Type=Float,Description="Mean mapping quality of observed reference alleles">
##INFO=<ID=PAIRED,Number=A,Type=Float,Description="Proportion of observed alternate alleles which are supported by properly paired read fragments">
##INFO=<ID=PAIREDR,Number=1,Type=Float,Description="Proportion of observed reference alleles which are supported by properly paired read fragments">
##INFO=<ID=MIN,Number=1,Type=Integer,Description="Minimum depth in gVCF output block.">
##INFO=<ID=END,Number=1,Type=Integer,Description="Last position (inclusive) in gVCF output record.">
##FORMAT=<ID=GT,Number=1,Type=String,Description="Genotype">
##FORMAT=<ID=GQ,Number=1,Type=Float,Description="Genotype Quality, the Phred-scaled marginal (or unconditional) probability of the called genotype">
##FORMAT=<ID=GL,Number=G,Type=Float,Description="Genotype Likelihood, log10-scaled likelihoods of the data given the called genotype for each possible genotype generated from the reference and alternate alleles given the sample ploidy">
##FORMAT=<ID=DP,Number=1,Type=Integer,Description="Read Depth">
##FORMAT=<ID=RO,Number=1,Type=Integer,Description="Reference allele observation count">
##FORMAT=<ID=QR,Number=1,Type=Integer,Description="Sum of quality of the reference observations">
##FORMAT=<ID=AO,Number=A,Type=Integer,Description="Alternate allele observation count">
##FORMAT=<ID=QA,Number=A,Type=Integer,Description="Sum of quality of the alternate observations">
##FORMAT=<ID=MIN,Number=1,Type=Integer,Description="Minimum depth in gVCF output block.">
#CHROM	POS	ID	REF	ALT	QUAL	FILTER	INFO	FORMAT	unknown
vb1_example	33	.	G	A	3.05576e-14	.	AB=0;ABP=0;AC=0;AF=0;AN=2;AO=10;CIGAR=1X;DP=180;DPB=180;DPRA=0;EPP=6.48466;EPPR=7.14887;GTI=0;LEN=1;MEANALT=1;MQM=60;MQMR=60;NS=1;NUMALT=1;ODDS=148.554;PAIRED=0;PAIREDR=0;PAO=0;PQA=0;PQR=0;PRO=0;QA=365;QR=6326;RO=170;RPL=3;RPP=6.48466;RPPR=84.7598;RPR=7;RUN=1;SAF=8;SAP=10.8276;SAR=2;SRF=67;SRP=19.5646;SRR=103;TYPE=snp	GT:DP:RO:QR:AO:QA:GL	0/0:180:170:6326:10:365:0,-20.9938,-536.059
vb1_example	39	.	G	A	0	.	AB=0;ABP=0;AC=0;AF=0;AN=2;AO=10;CIGAR=1X;DP=182;DPB=182;DPRA=0;EPP=6.48466;EPPR=3.2123;GTI=0;LEN=1;MEANALT=1;MQM=60;MQMR=60;NS=1;NUMALT=1;ODDS=149.547;PAIRED=0;PAIREDR=0;PAO=0;PQA=0;PQR=0;PRO=0;QA=373;QR=6295;RO=172;RPL=2;RPP=10.8276;RPPR=45.4803;RPR=8;RUN=1;SAF=7;SAP=6.48466;SAR=3;SRF=67;SRP=21.2406;SRR=105;TYPE=snp	GT:DP:RO:QR:AO:QA:GL	0/0:182:172:6295:10:373:0,-20.8725,-532.568
vb1_example	42	.	T	G	578.133	.	AB=0.217617;ABP=136.685;AC=1;AF=0.5;AN=2;AO=42;CIGAR=1X;DP=193;DPB=193;DPRA=0;EPP=4.87156;EPPR=9.35215;GTI=0;LEN=1;MEANALT=1;MQM=60;MQMR=60;NS=1;NUMALT=1;ODDS=133.12;PAIRED=0;PAIREDR=0;PAO=0;PQA=0;PQR=0;PRO=0;QA=1537;QR=5401;RO=151;RPL=11;RPP=23.691;RPPR=29.6001;RPR=31;RUN=1;SAF=17;SAP=6.31921;SAR=25;SRF=66;SRP=8.2017;SRR=85;TYPE=snp	GT:DP:RO:QR:AO:QA:GL	0/1:193:151:5401:42:1537:-80.5036,0,-428.023
vb1_example	58	.	ACCAC	GCCAT,GCCAC	6504.42	.	AB=0,0;ABP=0,0;AC=2,0;AF=1,0;AN=2;AO=189,7;CIGAR=1X3M1X,1X4M;DP=197;DPB=209.4;DPRA=0,0;EPP=5.59539,5.80219;EPPR=5.18177;GTI=0;LEN=5,1;MEANALT=2,2;MQM=60,60;MQMR=60;NS=1;NUMALT=2;ODDS=219.413;PAIRED=0,0;PAIREDR=0;PAO=17.5,4.5;PQA=613.5,162.5;PQR=0;PRO=0;QA=6858,267;QR=27;RO=1;RPL=87,5;RPP=5.59539,5.80219;RPPR=5.18177;RPR=102,2;RUN=1,1;SAF=83,5;SAP=9.08812,5.80219;SAR=106,2;SRF=1;SRP=5.18177;SRR=0;…	GT:DP:RO:QR:AO:QA:GL	1/1:197:1:27:189,7:6858,267:-654.37,-64.1117,0,-638.731,-44.2293,-633.333
vb1_example	72	.	TTTCT	GTTCC	2387.68	.	AB=0.453202;ABP=6.87188;AC=1;AF=0.5;AN=2;AO=92;CIGAR=1X3M1X;DP=203;DPB=211.8;DPRA=0;EPP=3.38795;EPPR=6.87947;GTI=0;LEN=5;MEANALT=2;MQM=60;MQMR=60;NS=1;NUMALT=1;ODDS=549.784;PAIRED=0;PAIREDR=0;PAO=9;PQA=320;PQR=226;PRO=7;QA=3147;QR=4036;RO=110;RPL=37;RPP=10.6577;RPPR=10.9066;RPR=55;RUN=1;SAF=49;SAP=3.86001;SAR=43;SRF=53;SRP=3.32615;SRR=57;TYPE=complex	GT:DP:RO:QR:AO:QA:GL	0/1:203:110:4036:92:3147:-246.493,0,-317.957
vb1_example	93	.	T	C	760.039	.	AB=0.228571;ABP=137.393;AC=1;AF=0.5;AN=2;AO=48;CIGAR=1X;DP=210;DPB=210;DPRA=0;EPP=11.8771;EPPR=7.35324;GTI=0;LEN=1;MEANALT=1;MQM=60;MQMR=60;NS=1;NUMALT=1;ODDS=175.005;PAIRED=0;PAIREDR=0;PAO=0;PQA=0;PQR=0;PRO=0;QA=1798;QR=6091;RO=162;RPL=33;RPP=17.6677;RPPR=3.0103;RPR=15;RUN=1;SAF=28;SAP=5.9056;SAR=20;SRF=85;SRP=3.86817;SRR=77;TYPE=snp	GT:DP:RO:QR:AO:QA:GL	0/1:210:162:6091:48:1798:-98.8374,0,-484.875
vb1_example	100	.	C	T	4.47555e-15	.	AB=0;ABP=0;AC=0;AF=0;AN=2;AO=2;CIGAR=1X;DP=198;DPB=198;DPRA=0;EPP=3.0103;EPPR=8.37251;GTI=0;LEN=1;MEANALT=1;MQM=60;MQMR=60;NS=1;NUMALT=1;ODDS=256.899;PAIRED=0;PAIREDR=0;PAO=0;PQA=0;PQR=0;PRO=0;QA=69;QR=7129;RO=196;RPL=0;RPP=7.35324;RPPR=10.4997;RPR=2;RUN=1;SAF=1;SAP=3.0103;SAR=1;SRF=110;SRP=9.39177;SRR=86;TYPE=snp	GT:DP:RO:QR:AO:QA:GL	0/0:198:196:7129:2:69:0,-53.0517,-634.915
vb1_example	133	.	C	T	2691.06	.	AB=0.547872;ABP=6.75262;AC=1;AF=0.5;AN=2;AO=103;CIGAR=1X;DP=188;DPB=188;DPRA=0;EPP=4.04333;EPPR=3.0103;GTI=0;LEN=1;MEANALT=2;MQM=60;MQMR=60;NS=1;NUMALT=1;ODDS=460.872;PAIRED=0;PAIREDR=0;PAO=0;PQA=0;PQR=0;PRO=0;QA=3697;QR=2948;RO=84;RPL=57;RPP=5.56125;RPPR=3.42391;RPR=46;RUN=1;SAF=53;SAP=3.20004;SAR=50;SRF=56;SRP=23.2774;SRR=28;TYPE=snp	GT:DP:RO:QR:AO:QA:GL	0/1:188:84:2948:103:3697:-276.449,0,-209.072
vb1_example	139	.	TCCAC	ACCAA,ACCAC,TCCAA	295.314	.	AB=0.195122,0.0914634,0.0121951;ABP=135.417,240.76,341.972;AC=1,0,0;AF=0.5,0,0;AN=2;AO=32,15,2;CIGAR=1X3M1X,1X4M,4M1X;DP=164;DPB=172.4;DPRA=0,0,0;EPP=4.09604,6.62942,7.35324;EPPR=3.93554;GTI=0;LEN=5,1,1;MEANALT=3,3,3;MQM=60,60,60;MQMR=60;NS=1;NUMALT=3;ODDS=67.9985;PAIRED=0,0,0;PAIREDR=0;PAO=1.5,3.5,4;PQA=52,104,128;PQR=180;PRO=6;QA=1117,552,66;QR=4177;RO=115;RPL=19,4,2;RPP=5.45321,10.1038,7.35324…	GT:DP:RO:QR:AO:QA:GL	0/1:164:115:4177:32,15,2:1117,552,66:-47.0057,0,-321.125,-45.7047,-290.632,-372.741,-83.5139,-332.533,-381.44,-415.967
vb1_example	150	.	A	G	0	.	AB=0;ABP=0;AC=0;AF=0;AN=2;AO=3;CIGAR=1X;DP=159;DPB=159;DPRA=0;EPP=9.52472;EPPR=6.57374;GTI=0;LEN=1;MEANALT=1;MQM=60;MQMR=60;NS=1;NUMALT=1;ODDS=192.321;PAIRED=0;PAIREDR=0;PAO=0;PQA=0;PQR=0;PRO=0;QA=119;QR=5623;RO=156;RPL=3;RPP=9.52472;RPPR=5.01474;RPR=0;RUN=1;SAF=0;SAP=9.52472;SAR=3;SRF=94;SRP=17.2641;SRR=62;TYPE=snp	GT:DP:RO:QR:AO:QA:GL	0/0:159:156:5623:3:119:0,-36.7686,-494.962
vb1_example	167	.	TGGC	AGGT,TGGT	0	.	AB=0.115646,0.0952381;ABP=191.633,212.195;AC=1,0;AF=0.5,0;AN=2;AO=17,14;CIGAR=1X2M1X,3M1X;DP=147;DPB=156.5;DPRA=0,0;EPP=3.13803,5.49198;EPPR=3.18024;GTI=0;LEN=4,1;MEANALT=3,3;MQM=59.3529,60;MQMR=60;NS=1;NUMALT=2;ODDS=48.7333;PAIRED=0,0;PAIREDR=0;PAO=1.5,6;PQA=51.5,173;PQR=254.5;PRO=9.5;QA=562,414;QR=4024;RO=115;RPL=7,10;RPP=4.1599,8.59409;RPPR=11.3374;RPR=10,4;RUN=1,1;SAF=7,11;SAP=4.1599,12.937;S…	GT:DP:RO:QR:AO:QA:GL	0/1:147:115:4024:17,14:562,414:-1.92903,0,-324.191,-12.4306,-304.813,-338.8
vb1_example	182	.	C	G	1.69481e-13	.	AB=0.115152;ABP=215.275;AC=1;AF=0.5;AN=2;AO=19;CIGAR=1X;DP=165;DPB=165;DPRA=0;EPP=4.03889;EPPR=3.24827;GTI=0;LEN=1;MEANALT=1;MQM=60;MQMR=59.9247;NS=1;NUMALT=1;ODDS=33.2396;PAIRED=0;PAIREDR=0;PAO=0;PQA=0;PQR=0;PRO=0;QA=735;QR=5442;RO=146;RPL=5;RPP=12.2676;RPPR=7.82918;RPR=14;RUN=1;SAF=14;SAP=12.2676;SAR=5;SRF=79;SRP=5.15203;SRR=67;TYPE=snp	GT:DP:RO:QR:AO:QA:GL	0/1:165:146:5442:19:735:-16.8043,0,-440.08
vb1_example	200	.	A	G	5.6065e-08	.	AB=0.128049;ABP=200.085;AC=1;AF=0.5;AN=2;AO=21;CIGAR=1X;DP=164;DPB=164;DPRA=0;EPP=5.59539;EPPR=3.14697;GTI=0;LEN=1;MEANALT=1;MQM=60;MQMR=59.9231;NS=1;NUMALT=1;ODDS=18.1653;PAIRED=0;PAIREDR=0;PAO=0;PQA=0;PQR=0;PRO=0;QA=768;QR=5247;RO=143;RPL=11;RPP=3.1137;RPPR=4.24029;RPR=10;RUN=1;SAF=8;SAP=5.59539;SAR=13;SRF=79;SRP=6.42695;SRR=64;TYPE=snp	GT:DP:RO:QR:AO:QA:GL	0/1:164:143:5247:21:768:-20.0577,0,-422.876
vb1_example	205	.	GTCCGGATTA	TTCCAGTTTC,GTCCAGGTTC,GTCCAGGCTC,GTCCAGAATC,GTCGGGATTA,GTCTGGATTA	2031	.	AB=0.229508,0.0245902,0.172131,0.114754,0.245902,0.196721;ABP=80.5425,242.513,116.924,160.282,71.4295,100.477;AC=1,0,0,0,1,0;AF=0.5,0,0,0,0.5,0;AN=2;AO=28,3,21,14,30,24;CIGAR=1X3M1X1M1X2M1X,4M1X1M1X2M1X,4M1X1M2X1M1X,4M1X2M1X1M1X,3M1X6M,3M1X6M;DP=122;DPB=138.7;DPRA=0,0,0,0,0,0;EPP=5.80219,3.73412,3.1137,3.63072,7.64277,3.37221;EPPR=0;GTI=0;LEN=10,10,10,10,1,1;MEANALT=8,8,8,8,8,8;MQM=60,60,60,60,60…	GT:DP:RO:QR:AO:QA:GL	1/5:122:0:0:28,3,21,14,30,24:1052,102,735,485,1121,883:-212.603,-150.104,-73.4987,-233.08,-137.6,-205.067,-181.561,-86.082,-169.058,-148.13,-195.893,-100.413,-183.389,-131.871,-163.966,-122.828,0,-120.925,-69.4059,-83.7369,-65.8104,-160.304,-37.4766,-158.401,-106.882,-121.213,-10.2015,-106.898
vb1_example	227	.	CTGAA	GTGAG,GTGAA	1874.14	.	AB=0.319728,0.421769;ABP=44.5046,10.8246;AC=1,1;AF=0.5,0.5;AN=2;AO=47,62;CIGAR=1X3M1X,1X4M;DP=147;DPB=148.2;DPRA=0,0;EPP=4.16534,3.15039;EPPR=3.23888;GTI=0;LEN=5,1;MEANALT=2,2;MQM=60,59.8226;MQMR=60;NS=1;NUMALT=2;ODDS=43.9718;PAIRED=0,0;PAIREDR=0;PAO=1,1.5;PQA=39,55.5;PQR=50.5;PRO=1.5;QA=1666,2321;QR=1395;RO=38;RPL=27,32;RPP=5.27418,3.15039;RPPR=3.23888;RPR=20,30;RUN=1,1;SAF=28,38;SAP=6.75262,9.8…	GT:DP:RO:QR:AO:QA:GL	1/2:147:38:1395:47,62:1666,2321:-195.27,-73.2475,-174.009,-18.906,0,-115.22
vb1_example	246	.	A	G	0	.	AB=0;ABP=0;AC=0;AF=0;AN=2;AO=8;CIGAR=1X;DP=148;DPB=148;DPRA=0;EPP=7.35324;EPPR=4.00297;GTI=0;LEN=1;MEANALT=1;MQM=60;MQMR=59.9214;NS=1;NUMALT=1;ODDS=126.758;PAIRED=0;PAIREDR=0;PAO=0;PQA=0;PQR=0;PRO=0;QA=288;QR=5234;RO=140;RPL=6;RPP=7.35324;RPPR=11.9444;RPR=2;RUN=1;SAF=6;SAP=7.35324;SAR=2;SRF=78;SRP=6.98099;SRR=62;TYPE=snp	GT:DP:RO:QR:AO:QA:GL	0/0:148:140:5234:8:288:0,-18.2877,-444.744
vb1_example	305	.	G	C	966.658	.	AB=0.392857;ABP=14.1779;AC=1;AF=0.5;AN=2;AO=44;CIGAR=1X;DP=112;DPB=112;DPRA=0;EPP=19.0002;EPPR=3.04271;GTI=0;LEN=1;MEANALT=2;MQM=60;MQMR=60;NS=1;NUMALT=1;ODDS=222.581;PAIRED=0;PAIREDR=0;PAO=0;PQA=0;PQR=0;PRO=0;QA=1548;QR=2487;RO=67;RPL=24;RPP=3.79993;RPPR=3.30199;RPR=20;RUN=1;SAF=27;SAP=7.94546;SAR=17;SRF=33;SRP=3.04271;SRR=34;TYPE=snp	GT:DP:RO:QR:AO:QA:GL	0/1:112:67:2487:44:1548:-105.759,0,-190.204
vb1_example	320	.	ACTGT	GCTGA,GCTGT,ACGGT	1332.46	.	AB=0.110092,0.46789,0.0183486;ABP=146.945,3.98647,222.648;AC=0,1,0;AF=0,0.5,0;AN=2;AO=12,51,2;CIGAR=1X3M1X,1X4M,2M1X2M;DP=109;DPB=114;DPRA=0,0,0;EPP=5.9056,3.05288,3.0103;EPPR=3.79993;GTI=0;LEN=5,1,1;MEANALT=3,3,3;MQM=60,60,60;MQMR=60;NS=1;NUMALT=3;ODDS=214.374;PAIRED=0,0,0;PAIREDR=0;PAO=1.5,3,2.5;PQA=58.5,97.1667,79.6667;PQR=93.6667;PRO=3;QA=453,1932,76;QR=1591;RO=44;RPL=5,26,1;RPP=3.73412,3.052…	GT:DP:RO:QR:AO:QA:GL	0/2:109:44:1591:12,51,2:453,1932,76:-139.353,-118.046,-234.673,0,-88.8403,-108.705,-148.277,-236.463,-120.397,-271.919
vb1_example	325	.	G	A	498.3	.	AB=0.245763;ABP=69.2586;AC=1;AF=0.5;AN=2;AO=29;CIGAR=1X;DP=118;DPB=118;DPRA=0;EPP=3.68421;EPPR=3.0347;GTI=0;LEN=1;MEANALT=1;MQM=60;MQMR=60;NS=1;NUMALT=1;ODDS=114.738;PAIRED=0;PAIREDR=0;PAO=0;PQA=0;PQR=0;PRO=0;QA=1087;QR=3246;RO=89;RPL=12;RPP=4.88226;RPPR=3.0347;RPR=17;RUN=1;SAF=14;SAP=3.08518;SAR=15;SRF=58;SRP=20.7969;SRR=31;TYPE=snp	GT:DP:RO:QR:AO:QA:GL	0/1:118:89:3246:29:1087:-62.5983,0,-256.765
vb1_example	335	.	A	C	7.77536e-15	.	AB=0.0901639;ABP=181;AC=1;AF=0.5;AN=2;AO=11;CIGAR=1X;DP=122;DPB=122;DPRA=0;EPP=7.94546;EPPR=7.41193;GTI=0;LEN=1;MEANALT=1;MQM=60;MQMR=60;NS=1;NUMALT=1;ODDS=58.9299;PAIRED=0;PAIREDR=0;PAO=0;PQA=0;PQR=0;PRO=0;QA=410;QR=4137;RO=111;RPL=7;RPP=4.78696;RPPR=10.0725;RPR=4;RUN=1;SAF=6;SAP=3.20771;SAR=5;SRF=69;SRP=17.2716;SRR=42;TYPE=snp	GT:DP:RO:QR:AO:QA:GL	0/1:122:111:4137:11:410:-0.518925,0,-335.658
vb1_example	349	.	A	C,G	0	.	AB=0,0;ABP=0,0;AC=0,0;AF=0,0;AN=2;AO=5,4;CIGAR=1X,1X;DP=125;DPB=125;DPRA=0,0;EPP=13.8677,5.18177;EPPR=24.6501;GTI=0;LEN=1,1;MEANALT=2,2;MQM=60,60;MQMR=60;NS=1;NUMALT=2;ODDS=122.397;PAIRED=0,0;PAIREDR=0;PAO=0,0;PQA=0,0;PQR=0;PRO=0;QA=199,145;QR=4167;RO=116;RPL=0,1;RPP=13.8677,5.18177;RPPR=3.08518;RPR=5,3;RUN=1,1;SAF=5,2;SAP=13.8677,3.0103;SAR=0,2;SRF=70;SRP=13.7928;SRR=46;TYPE=snp,snp	GT:DP:RO:QR:AO:QA:GL	0/0:125:116:4167:5,4:199,145:0,-18.5145,-356.827,-23.0969,-346.494,-361.677
vb1_example	354	.	G	A	0	.	AB=0;ABP=0;AC=0;AF=0;AN=2;AO=3;CIGAR=1X;DP=133;DPB=133;DPRA=0;EPP=9.52472;EPPR=41.4955;GTI=0;LEN=1;MEANALT=1;MQM=60;MQMR=60;NS=1;NUMALT=1;ODDS=157.182;PAIRED=0;PAIREDR=0;PAO=0;PQA=0;PQR=0;PRO=0;QA=107;QR=4921;RO=130;RPL=1;RPP=3.73412;RPPR=7.28643;RPR=2;RUN=1;SAF=1;SAP=3.73412;SAR=2;SRF=82;SRP=22.3197;SRR=48;TYPE=snp	GT:DP:RO:QR:AO:QA:GL	0/0:133:130:4921:3:107:0,-30.0549,-432.895
vb1_example	372	.	A	T	7.68496e-15	.	AB=0;ABP=0;AC=0;AF=0;AN=2;AO=12;CIGAR=1X;DP=160;DPB=160;DPRA=0;EPP=3.73412;EPPR=3.24505;GTI=0;LEN=1;MEANALT=1;MQM=60;MQMR=60;NS=1;NUMALT=1;ODDS=100.969;PAIRED=0;PAIREDR=0;PAO=0;PQA=0;PQR=0;PRO=0;QA=442;QR=5566;RO=148;RPL=2;RPP=14.5915;RPPR=16.2152;RPR=10;RUN=1;SAF=5;SAP=3.73412;SAR=7;SRF=89;SRP=16.2152;SRR=59;TYPE=snp	GT:DP:RO:QR:AO:QA:GL	0/0:160:148:5566:12:442:0,-8.0507,-460.759
vb1_example	375	.	A	C	720.463	.	AB=0.253012;ABP=90.968;AC=1;AF=0.5;AN=2;AO=42;CIGAR=1X;DP=166;DPB=166;DPRA=0;EPP=8.18047;EPPR=3.0103;GTI=0;LEN=1;MEANALT=1;MQM=60;MQMR=60;NS=1;NUMALT=1;ODDS=165.893;PAIRED=0;PAIREDR=0;PAO=0;PQA=0;PQR=0;PRO=0;QA=1549;QR=4579;RO=124;RPL=15;RPP=10.4553;RPPR=8.68415;RPR=27;RUN=1;SAF=29;SAP=16.2459;SAR=13;SRF=67;SRP=4.76149;SRR=57;TYPE=snp	GT:DP:RO:QR:AO:QA:GL	0/1:166:124:4579:42:1549:-89.6957,0,-362.16
vb1_example	390	.	A	G	9.64327e-16	.	AB=0.114583;ABP=250.739;AC=1;AF=0.5;AN=2;AO=22;CIGAR=1X;DP=192;DPB=192;DPRA=0;EPP=12.8806;EPPR=13.0246;GTI=0;LEN=1;MEANALT=1;MQM=60;MQMR=60;NS=1;NUMALT=1;ODDS=47.8446;PAIRED=0;PAIREDR=0;PAO=0;PQA=0;PQR=0;PRO=0;QA=795;QR=6195;RO=170;RPL=10;RPP=3.40511;RPPR=45.9799;RPR=12;RUN=1;SAF=14;SAP=6.56362;SAR=8;SRF=99;SRP=13.0246;SRR=71;TYPE=snp	GT:DP:RO:QR:AO:QA:GL	0/1:192:170:6195:22:795:-14.0601,0,-499.709
vb1_example	394	.	C	T	747.129	.	AB=0.247475;ABP=112.681;AC=1;AF=0.5;AN=2;AO=49;CIGAR=1X;DP=198;DPB=198;DPRA=0;EPP=12.9813;EPPR=10.7198;GTI=0;LEN=1;MEANALT=1;MQM=60;MQMR=60;NS=1;NUMALT=1;ODDS=172.033;PAIRED=0;PAIREDR=0;PAO=0;PQA=0;PQR=0;PRO=0;QA=1749;QR=5459;RO=149;RPL=9;RPP=45.5977;RPPR=20.863;RPR=40;RUN=1;SAF=20;SAP=6.59988;SAR=29;SRF=96;SRP=29.957;SRR=53;TYPE=snp	GT:DP:RO:QR:AO:QA:GL	0/1:198:149:5459:49:1749:-98.0591,0,-431.717
vb1_example	395	.	GG	TT,AG	754.408	.	AB=0.0970874,0.223301;ABP=293.482,140.003;AC=0,1;AF=0,0.5;AN=2;AO=20,46;CIGAR=2X,1X1M;DP=206;DPB=207.5;DPRA=0,0;EPP=13.8677,9.80795;EPPR=5.24381;GTI=0;LEN=2,1;MEANALT=2,2;MQM=60,60;MQMR=60;NS=1;NUMALT=2;ODDS=173.709;PAIRED=0,0;PAIREDR=0;PAO=0,1.5;PQA=0,0;PQR=0;PRO=1.5;QA=737,1679;QR=5024;RO=140;RPL=9,22;RPP=3.44459,3.19912;RPPR=70.5741;RPR=11,24;RUN=1,1;SAF=12,27;SAP=4.74748,6.03148;SAR=8,19;SRF=…	GT:DP:RO:QR:AO:QA:GL	0/2:206:140:5024:20,46:737,1679:-93.201,-76.8849,-476.951,0,-349.429,-394.042
vb1_example	406	.	C	T	1255.62	.	AB=0.280851;ABP=101.041;AC=1;AF=0.5;AN=2;AO=66;CIGAR=1X;DP=235;DPB=235;DPRA=0;EPP=3.53672;EPPR=31.3936;GTI=0;LEN=1;MEANALT=1;MQM=59.9545;MQMR=60;NS=1;NUMALT=1;ODDS=289.118;PAIRED=0;PAIREDR=0;PAO=0;PQA=0;PQR=0;PRO=0;QA=2439;QR=6131;RO=169;RPL=11;RPP=66.7068;RPPR=11.0409;RPR=55;RUN=1;SAF=36;SAP=4.19474;SAR=30;SRF=95;SRP=8.67669;SRR=74;TYPE=snp	GT:DP:RO:QR:AO:QA:GL	0/1:235:169:6131:66:2439:-148.969,0,-481.006
vb1_example	418	.	G	A	4203.04	.	AB=0.643154;ABP=45.9081;AC=1;AF=0.5;AN=2;AO=155;CIGAR=1X;DP=241;DPB=241;DPRA=0;EPP=4.70545;EPPR=5.53527;GTI=0;LEN=1;MEANALT=1;MQM=59.9806;MQMR=60;NS=1;NUMALT=1;ODDS=447.15;PAIRED=0;PAIREDR=0;PAO=0;PQA=0;PQR=0;PRO=0;QA=5627;QR=3086;RO=86;RPL=58;RPP=24.3187;RPPR=3.1113;RPR=97;RUN=1;SAF=74;SAP=3.69677;SAR=81;SRF=46;SRP=3.91929;SRR=40;TYPE=snp	GT:DP:RO:QR:AO:QA:GL	0/1:241:86:3086:155:5627:-433.884,0,-205.366
vb1_example	453	.	A	G	517.075	.	AB=0.182836;ABP=237.173;AC=1;AF=0.5;AN=2;AO=49;CIGAR=1X;DP=268;DPB=268;DPRA=0;EPP=8.37251;EPPR=12.539;GTI=0;LEN=1;MEANALT=1;MQM=59.7959;MQMR=58.5388;NS=1;NUMALT=1;ODDS=119.061;PAIRED=0;PAIREDR=0;PAO=0;PQA=0;PQR=0;PRO=0;QA=1827;QR=8172;RO=219;RPL=26;RPP=3.40914;RPPR=26.8172;RPR=23;RUN=1;SAF=20;SAP=6.59988;SAR=29;SRF=119;SRP=6.58976;SRR=100;TYPE=snp	GT:DP:RO:QR:AO:QA:GL	0/1:268:219:8172:49:1827:-83.98,0,-651.014
vb1_example	458	.	C	G	0	.	AB=0.099631;ABP=380.326;AC=1;AF=0.5;AN=2;AO=27;CIGAR=1X;DP=271;DPB=271;DPRA=0;EPP=6.95112;EPPR=18.0319;GTI=0;LEN=1;MEANALT=2;MQM=60;MQMR=57.7695;NS=1;NUMALT=1;ODDS=94.9867;PAIRED=0;PAIREDR=0;PAO=0;PQA=0;PQR=0;PRO=0;QA=1008;QR=8905;RO=243;RPL=16;RPP=5.02092;RPPR=6.95112;RPR=11;RUN=1;SAF=7;SAP=16.6021;SAR=20;SRF=132;SRP=6.95112;SRR=111;TYPE=snp	GT:DP:RO:QR:AO:QA:GL	0/1:271:243:8905:27:1008:-9.39371,0,-713.873
vb1_example	461	.	G	C	5388.23	.	AB=0.720149;ABP=115.83;AC=1;AF=0.5;AN=2;AO=193;CIGAR=1X;DP=268;DPB=268;DPRA=0;EPP=13.8227;EPPR=27.3597;GTI=0;LEN=1;MEANALT=1;MQM=57.6269;MQMR=58;NS=1;NUMALT=1;ODDS=344.304;PAIRED=0;PAIREDR=0;PAO=0;PQA=0;PQR=0;PRO=0;QA=7176;QR=2810;RO=75;RPL=112;RPP=13.8227;RPPR=3.27088;RPR=81;RUN=1;SAF=104;SAP=5.54181;SAR=89;SRF=38;SRP=3.03925;SRR=37;TYPE=snp	GT:DP:RO:QR:AO:QA:GL	0/1:268:75:2810:193:7176:-559.903,0,-170.078
vb1_example	464	.	GTA	TTT	4.20088e-14	.	AB=0;ABP=0;AC=0;AF=0;AN=2;AO=14;CIGAR=1X1M1X;DP=208;DPB=211;DPRA=0;EPP=12.937;EPPR=21.1059;GTI=0;LEN=3;MEANALT=3;MQM=50.6429;MQMR=58.2031;NS=1;NUMALT=1;ODDS=154.492;PAIRED=0;PAIREDR=0;PAO=0;PQA=0;PQR=137;PRO=4;QA=543;QR=6865;RO=192;RPL=0;RPP=33.4109;RPPR=16.0844;RPR=14;RUN=1;SAF=11;SAP=12.937;SAR=3;SRF=97;SRP=3.05554;SRR=95;TYPE=complex	GT:DP:RO:QR:AO:QA:GL	0/0:208:192:6865:14:543:0,-16.8192,-580.336
vb1_example	469	.	TT	TTTTGT	0	.	AB=0.106996;ABP=329.008;AC=1;AF=0.5;AN=2;AO=26;CIGAR=1M4I1M;DP=243;DPB=298;DPRA=0;EPP=3.34437;EPPR=42.7272;GTI=0;LEN=4;MEANALT=1;MQM=55.3462;MQMR=57.5253;NS=1;NUMALT=1;ODDS=88.8384;PAIRED=0;PAIREDR=0;PAO=3;PQA=91;PQR=91;PRO=3;QA=907;QR=8280;RO=217;RPL=15;RPP=4.34659;RPPR=4.22112;RPR=11;RUN=1;SAF=13;SAP=3.0103;SAR=13;SRF=121;SRP=9.26454;SRR=96;TYPE=ins	GT:DP:RO:QR:AO:QA:GL	0/1:243:217:8280:26:907:-4.34088,0,-661.427
vb1_example	479	.	ATATATTTTTTA	ATGTATTTTTTTTA,GTGTATTTTTTTA,ATATAGTTTTTTA,ATATATTTTTTTA,ATATATTTTTTTTA	3500.71	.	AB=0,0,0,0,0;ABP=0,0,0,0,0;AC=0,0,0,2,0;AF=0,0,0,1,0;AN=2;AO=12,25,19,116,15;CIGAR=1M2I3M1X7M,1X1M1X2M1I7M,5M1I7M,5M1I7M,5M2I7M;DP=194;DPB=243.5;DPRA=0,0,0,0,0;EPP=3.0103,10.0459,4.03889,12.0706,10.1038;EPPR=0;GTI=0;LEN=14,13,1,1,2;MEANALT=9,9,9,9,9;MQM=43.25,60,54.2105,52.8534,59.2;MQMR=0;NS=1;NUMALT=5;ODDS=46.8245;PAIRED=0,0,0,0,0;PAIREDR=0;PAO=5,8.5,7.5,12,12.5;PQA=173.75,308.25,265,421.75,442…	GT:DP:RO:QR:AO:QA:GL	4/4:194:0:0:12,25,19,116,15:437,861,611,4030,508:-355.904,-380.49,-298.098,-324.812,-247.13,-223.215,-346.535,-281.509,-225.832,-268.964,-88.2018,-55.8811,-0.202457,-28.2631,0,-373.622,-339.316,-285.626,-313.68,-49.0144,-314.319
vb1_example	491	.	A	T	0	.	AB=0;ABP=0;AC=0;AF=0;AN=2;AO=19;CIGAR=1X;DP=223;DPB=223;DPRA=0;EPP=3.12459;EPPR=3.3935;GTI=0;LEN=1;MEANALT=1;MQM=42.5263;MQMR=54.1471;NS=1;NUMALT=1;ODDS=119.602;PAIRED=0;PAIREDR=0;PAO=0;PQA=0;PQR=0;PRO=0;QA=693;QR=7460;RO=204;RPL=12;RPP=5.8675;RPPR=6.45911;RPR=7;RUN=1;SAF=9;SAP=3.12459;SAR=10;SRF=116;SRP=11.3556;SRR=88;TYPE=snp	GT:DP:RO:QR:AO:QA:GL	0/0:223:204:7460:19:693:0,-7.47769,-594.741
vb1_example	495	.	C	A	5.36407e-14	.	AB=0.0981308;ABP=303.201;AC=1;AF=0.5;AN=2;AO=21;CIGAR=1X;DP=214;DPB=214;DPRA=0;EPP=11.386;EPPR=3.56161;GTI=0;LEN=1;MEANALT=1;MQM=50.4762;MQMR=52.8187;NS=1;NUMALT=1;ODDS=94.4796;PAIRED=0;PAIREDR=0;PAO=0;PQA=0;PQR=0;PRO=0;QA=734;QR=6941;RO=193;RPL=13;RPP=5.59539;RPPR=4.37169;RPR=8;RUN=1;SAF=13;SAP=5.59539;SAR=8;SRF=109;SRP=10.0423;SRR=84;TYPE=snp	GT:DP:RO:QR:AO:QA:GL	0/1:214:193:6941:21:734:-0.21187,0,-541.812
vb1_example	503	.	A	C	6.59985e-15	.	AB=0;ABP=0;AC=0;AF=0;AN=2;AO=5;CIGAR=1X;DP=206;DPB=206;DPRA=0;EPP=6.91895;EPPR=13.3923;GTI=0;LEN=1;MEANALT=1;MQM=53.8;MQMR=52.2935;NS=1;NUMALT=1;ODDS=267.299;PAIRED=0;PAIREDR=0;PAO=0;PQA=0;PQR=0;PRO=0;QA=39;QR=6293;RO=201;RPL=0;RPP=13.8677;RPPR=17.8001;RPR=5;RUN=1;SAF=1;SAP=6.91895;SAR=4;SRF=120;SRP=19.4422;SRR=81;TYPE=snp	GT:DP:RO:QR:AO:QA:GL	0/0:206:201:6293:5:39:0,-58.4257,-551.385
vb1_example	506	.	A	C	1.15573e-14	.	AB=0;ABP=0;AC=0;AF=0;AN=2;AO=7;CIGAR=1X;DP=206;DPB=206;DPRA=0;EPP=10.7656;EPPR=15.6882;GTI=0;LEN=1;MEANALT=2;MQM=40.5714;MQMR=52.7071;NS=1;NUMALT=1;ODDS=256.778;PAIRED=0;PAIREDR=0;PAO=0;PQA=0;PQR=0;PRO=0;QA=69;QR=6266;RO=198;RPL=1;RPP=10.7656;RPPR=30.4279;RPR=6;RUN=1;SAF=0;SAP=18.2106;SAR=7;SRF=122;SRP=26.2165;SRR=76;TYPE=snp	GT:DP:RO:QR:AO:QA:GL	0/0:206:198:6266:7:69:0,-55.6095,-544.087
vb1_example	508	.	C	A	737.976	.	AB=0.262136;ABP=104.247;AC=1;AF=0.5;AN=2;AO=54;CIGAR=1X;DP=206;DPB=206;DPRA=0;EPP=7.03155;EPPR=28.2108;GTI=0;LEN=1;MEANALT=1;MQM=43.1852;MQMR=55.6118;NS=1;NUMALT=1;ODDS=169.925;PAIRED=0;PAIREDR=0;PAO=0;PQA=0;PQR=0;PRO=0;QA=1817;QR=5425;RO=152;RPL=35;RPP=13.3047;RPPR=28.2108;RPR=19;RUN=1;SAF=31;SAP=5.5839;SAR=23;SRF=88;SRP=11.239;SRR=64;TYPE=snp	GT:DP:RO:QR:AO:QA:GL	0/1:206:152:5425:54:1817:-92.1173,0,-420.31
vb1_example	513	.	GTTCTAT	ATTGAAG,GTTGAAG	1619.75	.	AB=0.0833333,0.611111;ABP=220.158,18.4519;AC=0,1;AF=0,0.5;AN=2;AO=12,88;CIGAR=1X2M2X1M1X,3M2X1M1X;DP=144;DPB=169.286;DPRA=0,0;EPP=3.73412,22.3561;EPPR=15.6443;GTI=0;LEN=7,7;MEANALT=2,2;MQM=55.0833,45.8864;MQMR=60;NS=1;NUMALT=2;ODDS=129.366;PAIRED=0,0;PAIREDR=0;PAO=2,28;PQA=72,979;PQR=1056;PRO=30;QA=403,2933;QR=1492;RO=44;RPL=8,56;RPP=5.9056,17.2236;RPPR=3.20771;RPR=4,32;RUN=1,1;SAF=7,52;SAP=3.734…	GT:DP:RO:QR:AO:QA:GL	0/2:144:44:1492:12,88:403,2933:-175.566,-184.993,-271.003,0,-89.1719,-67.0983
vb1_example	529	.	GTTTCAGAAAAAAAAAAAT	GATTCAGAAAAAAAAAAT,ATGACAGAAAAAAAAAAT,GTGACAGAAAAAAAAAAT,GTGACAGAAAAAAAAAAAAAT,GTGACAGAAAAAAAAAAAAAAT,GTTTCAGAAAAAAAAAAT,GTTTCAGAAAAAAAAAAAAAT	926.959	.	AB=0,0,0,0,0,0,0;ABP=0,0,0,0,0,0,0;AC=0,0,0,0,0,2,0;AF=0,0,0,0,0,1,0;AN=2;AO=9,10,9,7,2,33,8;CIGAR=1M1X5M1D11M,1X1M2X3M1D11M,2M2X3M1D11M,2M2X3M2I12M,2M2X3M3I12M,7M1D11M,7M2I12M;DP=83;DPB=129;DPRA=0,0,0,0,0,0,0;EPP=3.25157,10.8276,3.25157,18.2106,7.35324,3.0761,20.3821;EPPR=0;GTI=0;LEN=18,18,18,21,22,1,2;MEANALT=12,12,12,12,12,12,12;MQM=58.6667,34.6,43.8889,45.8571,36.5,59.8485,60;MQMR=0;NS=1;NUMA…	GT:DP:RO:QR:AO:QA:GL	6/6:83:0:0:9,10,9,7,2,33,8:285,307,304,199,32,1125,251:-95.4507,-141.828,-36.4743,-145.758,-64.0556,-40.1037,-158.867,-83.2074,-87.1389,-57.452,-178.563,-112.387,-116.318,-125.706,-67.8156,-191.923,-125.747,-129.677,-139.066,-137.799,-82.6799,-87.7186,-49.2305,-53.1672,-66.2696,-95.4466,-108.808,0,-162.341,-134.664,-138.596,-151.703,-158.388,-171.748,-80.552,-79.5579
vb1_example	550	.	G	A	2.39577e-14	.	AB=0.0958904;ABP=210.103;AC=1;AF=0.5;AN=2;AO=14;CIGAR=1X;DP=146;DPB=146;DPRA=0;EPP=3.63072;EPPR=9.59052;GTI=0;LEN=1;MEANALT=1;MQM=49.6429;MQMR=55.7576;NS=1;NUMALT=1;ODDS=62.7995;PAIRED=0;PAIREDR=0;PAO=0;PQA=0;PQR=0;PRO=0;QA=528;QR=4750;RO=132;RPL=9;RPP=5.49198;RPPR=6.23461;RPR=5;RUN=1;SAF=5;SAP=5.49198;SAR=9;SRF=47;SRP=26.7649;SRR=85;TYPE=snp	GT:DP:RO:QR:AO:QA:GL	0/1:146:132:4750:14:528:-2.15861,0,-374.41
vb1_example	556	.	C	T	905.838	.	AB=0.309211;ABP=51.0684;AC=1;AF=0.5;AN=2;AO=47;CIGAR=1X;DP=152;DPB=152;DPRA=0;EPP=5.27418;EPPR=3.19643;GTI=0;LEN=1;MEANALT=1;MQM=53.0213;MQMR=56.7048;NS=1;NUMALT=1;ODDS=208.577;PAIRED=0;PAIREDR=0;PAO=0;PQA=0;PQR=0;PRO=0;QA=1709;QR=3870;RO=105;RPL=21;RPP=4.16534;RPPR=8.98702;RPR=26;RUN=1;SAF=17;SAP=10.8184;SAR=30;SRF=39;SRP=18.0865;SRR=66;TYPE=snp	GT:DP:RO:QR:AO:QA:GL	0/1:152:105:3870:47:1709:-102.588,0,-298.89
vb1_example	557	.	G	A,T	5.21942e-14	.	AB=0.0974026,0.038961;ABP=219.819,287.332;AC=1,0;AF=0.5,0;AN=2;AO=15,6;CIGAR=1X,1X;DP=154;DPB=154;DPRA=0,0;EPP=4.31318,16.0391;EPPR=4.98585;GTI=0;LEN=1,1;MEANALT=2,2;MQM=57.5333,60;MQMR=55.3759;NS=1;NUMALT=2;ODDS=60.7216;PAIRED=0,0;PAIREDR=0;PAO=0,0;PQA=0,0;PQR=0;PRO=0;QA=557,228;QR=4947;RO=133;RPL=1,0;RPP=27.4756,16.0391;RPPR=3.41847;RPR=14,6;RUN=1,1;SAF=5,6;SAP=6.62942,16.0391;SAR=10,0;SRF=47;S…	GT:DP:RO:QR:AO:QA:GL	0/1:154:133:4947:15,6:557,228:-5.25596,0,-390.642,-26.5931,-376.46,-419.954
vb1_example	563	.	G	T	308.939	.	AB=0.197452;ABP=127.835;AC=1;AF=0.5;AN=2;AO=31;CIGAR=1X;DP=157;DPB=157;DPRA=0;EPP=4.76149;EPPR=3.28604;GTI=0;LEN=1;MEANALT=1;MQM=58;MQMR=56.6349;NS=1;NUMALT=1;ODDS=71.1359;PAIRED=0;PAIREDR=0;PAO=0;PQA=0;PQR=0;PRO=0;QA=1101;QR=4433;RO=126;RPL=8;RPP=18.771;RPPR=7.42218;RPR=23;RUN=1;SAF=14;SAP=3.64073;SAR=17;SRF=48;SRP=18.5208;SRR=78;TYPE=snp	GT:DP:RO:QR:AO:QA:GL	0/1:157:126:4433:31:1101:-51.7374,0,-345.999
vb1_example	570	.	G	C	0	.	AB=0.0943396;ABP=230.277;AC=1;AF=0.5;AN=2;AO=15;CIGAR=1X;DP=159;DPB=159;DPRA=0;EPP=4.31318;EPPR=11.6962;GTI=0;LEN=1;MEANALT=1;MQM=57.5333;MQMR=57.7153;NS=1;NUMALT=1;ODDS=69.1801;PAIRED=0;PAIREDR=0;PAO=0;PQA=0;PQR=0;PRO=0;QA=561;QR=5289;RO=144;RPL=6;RPP=4.31318;RPPR=4.51827;RPR=9;RUN=1;SAF=3;SAP=14.7363;SAR=12;SRF=61;SRP=10.3089;SRR=83;TYPE=snp	GT:DP:RO:QR:AO:QA:GL	0/1:159:144:5289:15:561:-2.70023,0,-424.522
vb1_example	574	.	AAGA	AA	0	.	AB=0;ABP=0;AC=0;AF=0;AN=2;AO=14;CIGAR=1M2D1M;DP=152;DPB=148;DPRA=0;EPP=5.49198;EPPR=18.2423;GTI=0;LEN=2;MEANALT=2;MQM=57.3571;MQMR=59.0292;NS=1;NUMALT=1;ODDS=78.1141;PAIRED=0;PAIREDR=0;PAO=0.5;PQA=9;PQR=140;PRO=4.5;QA=499;QR=4944;RO=137;RPL=6;RPP=3.63072;RPPR=3.15295;RPR=8;RUN=1;SAF=3;SAP=12.937;SAR=11;SRF=61;SRP=6.57659;SRR=76;TYPE=del	GT:DP:RO:QR:AO:QA:GL	0/0:152:137:4944:14:499:0,-2.46125,-411.333
vb1_example	590	.	T	A	0	.	AB=0;ABP=0;AC=0;AF=0;AN=2;AO=9;CIGAR=1X;DP=160;DPB=160;DPRA=0;EPP=9.04217;EPPR=13.4938;GTI=0;LEN=1;MEANALT=1;MQM=58.4444;MQMR=59.755;NS=1;NUMALT=1;ODDS=128.195;PAIRED=0;PAIREDR=0;PAO=0;PQA=0;PQR=0;PRO=0;QA=343;QR=5465;RO=151;RPL=6;RPP=5.18177;RPPR=10.6176;RPR=3;RUN=1;SAF=3;SAP=5.18177;SAR=6;SRF=61;SRP=15.1044;SRR=90;TYPE=snp	GT:DP:RO:QR:AO:QA:GL	0/0:160:151:5465:9:343:0,-16.9643,-460.507
vb1_example	600	.	T	C	1.80962e-12	.	AB=0.119205;ABP=193.194;AC=1;AF=0.5;AN=2;AO=18;CIGAR=1X;DP=151;DPB=151;DPRA=0;EPP=7.35324;EPPR=4.98585;GTI=0;LEN=1;MEANALT=1;MQM=60;MQMR=60;NS=1;NUMALT=1;ODDS=28.5466;PAIRED=0;PAIREDR=0;PAO=0;PQA=0;PQR=0;PRO=0;QA=669;QR=4993;RO=133;RPL=7;RPP=4.9405;RPPR=13.2146;RPR=11;RUN=1;SAF=11;SAP=4.9405;SAR=7;SRF=56;SRP=10.2104;SRR=77;TYPE=snp	GT:DP:RO:QR:AO:QA:GL	0/1:151:133:4993:18:669:-15.0822,0,-403.924
vb1_example	604	.	T	C	117.671	.	AB=0.156863;ABP=159.484;AC=1;AF=0.5;AN=2;AO=24;CIGAR=1X;DP=153;DPB=153;DPRA=0;EPP=6.26751;EPPR=6.79775;GTI=0;LEN=1;MEANALT=1;MQM=60;MQMR=60;NS=1;NUMALT=1;ODDS=27.0947;PAIRED=0;PAIREDR=0;PAO=0;PQA=0;PQR=0;PRO=0;QA=899;QR=4853;RO=129;RPL=9;RPP=6.26751;RPPR=7.87507;RPR=15;RUN=1;SAF=10;SAP=4.45795;SAR=14;SRF=59;SRP=5.04711;SRR=70;TYPE=snp	GT:DP:RO:QR:AO:QA:GL	0/1:153:129:4853:24:899:-35.1604,0,-390.723
vb1_example	621	.	G	A	0	.	AB=0;ABP=0;AC=0;AF=0;AN=2;AO=14;CIGAR=1X;DP=178;DPB=178;DPRA=0;EPP=5.49198;EPPR=18.3165;GTI=0;LEN=1;MEANALT=1;MQM=60;MQMR=59.9512;NS=1;NUMALT=1;ODDS=98.5881;PAIRED=0;PAIREDR=0;PAO=0;PQA=0;PQR=0;PRO=0;QA=536;QR=6128;RO=164;RPL=6;RPP=3.63072;RPPR=6.39992;RPR=8;RUN=1;SAF=5;SAP=5.49198;SAR=9;SRF=71;SRP=9.41879;SRR=93;TYPE=snp	GT:DP:RO:QR:AO:QA:GL	0/0:178:164:6128:14:536:0,-5.00778,-502.848
vb1_example	636	.	A	G	6095.27	.	AB=0;ABP=0;AC=2;AF=1;AN=2;AO=182;CIGAR=1X;DP=182;DPB=182;DPRA=0;EPP=6.876;EPPR=0;GTI=0;LEN=1;MEANALT=1;MQM=59.956;MQMR=0;NS=1;NUMALT=1;ODDS=256.911;PAIRED=0;PAIREDR=0;PAO=0;PQA=0;PQR=0;PRO=0;QA=6826;QR=0;RO=0;RPL=92;RPP=3.05802;RPPR=0;RPR=90;RUN=1;SAF=80;SAP=8.78498;SAR=102;SRF=0;SRP=0;SRR=0;TYPE=snp	GT:DP:RO:QR:AO:QA:GL	1/1:182:0:0:182:6826:-614.179,-54.7875,0
vb1_example	644	.	G	A	1456.32	.	AB=0.352332;ABP=39.5653;AC=1;AF=0.5;AN=2;AO=68;CIGAR=1X;DP=193;DPB=193;DPRA=0;EPP=7.60871;EPPR=3.16665;GTI=0;LEN=1;MEANALT=1;MQM=59.8824;MQMR=60;NS=1;NUMALT=1;ODDS=335.33;PAIRED=0;PAIREDR=0;PAO=0;PQA=0;PQR=0;PRO=0;QA=2389;QR=4683;RO=125;RPL=35;RPP=3.13803;RPPR=3.16665;RPR=33;RUN=1;SAF=25;SAP=13.3567;SAR=43;SRF=60;SRP=3.44459;SRR=65;TYPE=snp	GT:DP:RO:QR:AO:QA:GL	0/1:193:125:4683:68:2389:-157.111,0,-363.393
vb1_example	651	.	G	A	5995.46	.	AB=0;ABP=0;AC=2;AF=1;AN=2;AO=183;CIGAR=1X;DP=186;DPB=186;DPRA=0;EPP=3.30695;EPPR=3.73412;GTI=0;LEN=1;MEANALT=1;MQM=59.9563;MQMR=60;NS=1;NUMALT=1;ODDS=228.363;PAIRED=0;PAIREDR=0;PAO=0;PQA=0;PQR=0;PRO=0;QA=6814;QR=113;RO=3;RPL=88;RPP=3.59173;RPPR=3.73412;RPR=95;RUN=1;SAF=77;SAP=12.9896;SAR=106;SRF=0;SRP=9.52472;SRR=3;TYPE=snp	GT:DP:RO:QR:AO:QA:GL	1/1:186:3:113:183:6814:-602.565,-45.4535,0
vb1_example	662	.	A	T	3866.39	.	AB=0.744565;ABP=98.6023;AC=1;AF=0.5;AN=2;AO=137;CIGAR=1X;DP=184;DPB=184;DPRA=0;EPP=4.29416;EPPR=6.75262;GTI=0;LEN=1;MEANALT=1;MQM=59.9416;MQMR=60;NS=1;NUMALT=1;ODDS=208.623;PAIRED=0;PAIREDR=0;PAO=0;PQA=0;PQR=0;PRO=0;QA=5116;QR=1816;RO=47;RPL=65;RPP=3.78696;RPPR=3.0565;RPR=72;RUN=1;SAF=53;SAP=18.2423;SAR=84;SRF=15;SRP=16.3625;SRR=32;TYPE=snp	GT:DP:RO:QR:AO:QA:GL	0/1:184:47:1816:137:5116:-405.025,0,-108.276
vb1_example	686	.	G	C	546.862	.	AB=0.211055;ABP=147.32;AC=1;AF=0.5;AN=2;AO=42;CIGAR=1X;DP=199;DPB=199;DPRA=0;EPP=6.31921;EPPR=5.01474;GTI=0;LEN=1;MEANALT=2;MQM=60;MQMR=60;NS=1;NUMALT=1;ODDS=125.92;PAIRED=0;PAIREDR=0;PAO=0;PQA=0;PQR=0;PRO=0;QA=1538;QR=5821;RO=156;RPL=11;RPP=23.691;RPPR=3.23302;RPR=31;RUN=1;SAF=16;SAP=8.18047;SAR=26;SRF=56;SRP=29.9588;SRR=100;TYPE=snp	GT:DP:RO:QR:AO:QA:GL	0/1:199:156:5821:42:1538:-78.6851,0,-463.839
vb1_example	725	.	G	C	2861.8	.	AB=0.589888;ABP=15.5024;AC=1;AF=0.5;AN=2;AO=105;CIGAR=1X;DP=178;DPB=178;DPRA=0;EPP=22.8844;EPPR=3.75395;GTI=0;LEN=1;MEANALT=1;MQM=60;MQMR=60;NS=1;NUMALT=1;ODDS=411.082;PAIRED=0;PAIREDR=0;PAO=0;PQA=0;PQR=0;PRO=0;QA=3902;QR=2682;RO=73;RPL=64;RPP=13.9504;RPPR=16.1284;RPR=41;RUN=1;SAF=44;SAP=8.98702;SAR=61;SRF=30;SRP=8.03741;SRR=43;TYPE=snp	GT:DP:RO:QR:AO:QA:GL	0/1:178:73:2682:105:3902:-297.667,0,-187.981
vb1_example	732	.	G	A	6.63211e-16	.	AB=0;ABP=0;AC=0;AF=0;AN=2;AO=8;CIGAR=1X;DP=173;DPB=173;DPRA=0;EPP=4.09604;EPPR=29.6602;GTI=0;LEN=1;MEANALT=1;MQM=60;MQMR=60;NS=1;NUMALT=1;ODDS=159.95;PAIRED=0;PAIREDR=0;PAO=0;PQA=0;PQR=0;PRO=0;QA=278;QR=6129;RO=165;RPL=5;RPP=4.09604;RPPR=25.133;RPR=3;RUN=1;SAF=4;SAP=3.0103;SAR=4;SRF=66;SRP=17.342;SRR=99;TYPE=snp	GT:DP:RO:QR:AO:QA:GL	0/0:173:165:6129:8:278:0,-26.7316,-526.177
vb1_example	764	.	T	G	4379.9	.	AB=0.808824;ABP=172.002;AC=1;AF=0.5;AN=2;AO=165;CIGAR=1X;DP=204;DPB=204;DPRA=0;EPP=5.23441;EPPR=4.40227;GTI=0;LEN=1;MEANALT=1;MQM=60;MQMR=60;NS=1;NUMALT=1;ODDS=85.7633;PAIRED=0;PAIREDR=0;PAO=0;PQA=0;PQR=0;PRO=0;QA=5843;QR=1377;RO=39;RPL=67;RPP=15.6575;RPPR=15.538;RPR=98;RUN=1;SAF=80;SAP=3.33931;SAR=85;SRF=22;SRP=4.40227;SRR=17;TYPE=snp	GT:DP:RO:QR:AO:QA:GL	0/1:204:39:1377:165:5843:-464.462,0,-62.7907
vb1_example	781	.	A	G	0	.	AB=0;ABP=0;AC=0;AF=0;AN=2;AO=13;CIGAR=1X;DP=198;DPB=198;DPRA=0;EPP=4.51363;EPPR=3.11594;GTI=0;LEN=1;MEANALT=1;MQM=60;MQMR=60;NS=1;NUMALT=1;ODDS=137.795;PAIRED=0;PAIREDR=0;PAO=0;PQA=0;PQR=0;PRO=0;QA=494;QR=6834;RO=185;RPL=10;RPP=11.1951;RPPR=6.40249;RPR=3;RUN=1;SAF=4;SAP=7.18621;SAR=9;SRF=103;SRP=8.18662;SRR=82;TYPE=snp	GT:DP:RO:QR:AO:QA:GL	0/0:198:185:6834:13:494:0,-14.8072,-570.128
vb1_example	782	.	T	C	4.52028e-14	.	AB=0;ABP=0;AC=0;AF=0;AN=2;AO=17;CIGAR=1X;DP=198;DPB=198;DPRA=0;EPP=9.26925;EPPR=3.0103;GTI=0;LEN=1;MEANALT=2;MQM=60;MQMR=60;NS=1;NUMALT=1;ODDS=95.4283;PAIRED=0;PAIREDR=0;PAO=0;PQA=0;PQR=0;PRO=0;QA=644;QR=6601;RO=180;RPL=7;RPP=4.1599;RPPR=26.3657;RPR=10;RUN=1;SAF=11;SAP=6.20364;SAR=6;SRF=96;SRP=4.74748;SRR=84;TYPE=snp	GT:DP:RO:QR:AO:QA:GL	0/0:198:180:6601:17:644:0,-1.10786,-535.719

## Sheet: dna_haplotypes_3bp_window_line7
##fileformat=VCFv4.1
##fileDate=20181009
##source=freeBayes v1.0.2
##reference=tcr_vb1_example.fa
##phasing=none
##commandline="freebayes -f tcr_vb1_example.fa -F 0.01 -C 2 --pooled-continuous realigned_sorted_igv_7_vb1.bam"
##INFO=<ID=NS,Number=1,Type=Integer,Description="Number of samples with data">
##INFO=<ID=DP,Number=1,Type=Integer,Description="Total read depth at the locus">
##INFO=<ID=DPB,Number=1,Type=Float,Description="Total read depth per bp at the locus; bases in reads overlapping / bases in haplotype">
##INFO=<ID=AC,Number=A,Type=Integer,Description="Total number of alternate alleles in called genotypes">
##INFO=<ID=AN,Number=1,Type=Integer,Description="Total number of alleles in called genotypes">
##INFO=<ID=AF,Number=A,Type=Float,Description="Estimated allele frequency in the range (0,1]">
##INFO=<ID=RO,Number=1,Type=Integer,Description="Reference allele observation count, with partial observations recorded fractionally">
##INFO=<ID=AO,Number=A,Type=Integer,Description="Alternate allele observations, with partial observations recorded fractionally">
##INFO=<ID=PRO,Number=1,Type=Float,Description="Reference allele observation count, with partial observations recorded fractionally">
##INFO=<ID=PAO,Number=A,Type=Float,Description="Alternate allele observations, with partial observations recorded fractionally">
##INFO=<ID=QR,Number=1,Type=Integer,Description="Reference allele quality sum in phred">
##INFO=<ID=QA,Number=A,Type=Integer,Description="Alternate allele quality sum in phred">
##INFO=<ID=PQR,Number=1,Type=Float,Description="Reference allele quality sum in phred for partial observations">
##INFO=<ID=PQA,Number=A,Type=Float,Description="Alternate allele quality sum in phred for partial observations">
##INFO=<ID=SRF,Number=1,Type=Integer,Description="Number of reference observations on the forward strand">
##INFO=<ID=SRR,Number=1,Type=Integer,Description="Number of reference observations on the reverse strand">
##INFO=<ID=SAF,Number=A,Type=Integer,Description="Number of alternate observations on the forward strand">
##INFO=<ID=SAR,Number=A,Type=Integer,Description="Number of alternate observations on the reverse strand">
##INFO=<ID=SRP,Number=1,Type=Float,Description="Strand balance probability for the reference allele: Phred-scaled upper-bounds estimate of the probability of observing the deviation between SRF and SRR given E(SRF/SRR) ~ 0.5, derived using Hoeffding's inequality">
##INFO=<ID=SAP,Number=A,Type=Float,Description="Strand balance probability for the alternate allele: Phred-scaled upper-bounds estimate of the probability of observing the deviation between SAF and SAR given E(SAF/SAR) ~ 0.5, derived using Hoeffding's inequality">
##INFO=<ID=AB,Number=A,Type=Float,Description="Allele balance at heterozygous sites: a number between 0 and 1 representing the ratio of reads showing the reference allele to all reads, considering only reads from individuals called as heterozygous">
##INFO=<ID=ABP,Number=A,Type=Float,Description="Allele balance probability at heterozygous sites: Phred-scaled upper-bounds estimate of the probability of observing the deviation between ABR and ABA given E(ABR/ABA) ~ 0.5, derived using Hoeffding's inequality">
##INFO=<ID=RUN,Number=A,Type=Integer,Description="Run length: the number of consecutive repeats of the alternate allele in the reference genome">
##INFO=<ID=RPP,Number=A,Type=Float,Description="Read Placement Probability: Phred-scaled upper-bounds estimate of the probability of observing the deviation between RPL and RPR given E(RPL/RPR) ~ 0.5, derived using Hoeffding's inequality">
##INFO=<ID=RPPR,Number=1,Type=Float,Description="Read Placement Probability for reference observations: Phred-scaled upper-bounds estimate of the probability of observing the deviation between RPL and RPR given E(RPL/RPR) ~ 0.5, derived using Hoeffding's inequality">
##INFO=<ID=RPL,Number=A,Type=Float,Description="Reads Placed Left: number of reads supporting the alternate balanced to the left (5') of the alternate allele">
##INFO=<ID=RPR,Number=A,Type=Float,Description="Reads Placed Right: number of reads supporting the alternate balanced to the right (3') of the alternate allele">
##INFO=<ID=EPP,Number=A,Type=Float,Description="End Placement Probability: Phred-scaled upper-bounds estimate of the probability of observing the deviation between EL and ER given E(EL/ER) ~ 0.5, derived using Hoeffding's inequality">
##INFO=<ID=EPPR,Number=1,Type=Float,Description="End Placement Probability for reference observations: Phred-scaled upper-bounds estimate of the probability of observing the deviation between EL and ER given E(EL/ER) ~ 0.5, derived using Hoeffding's inequality">
##INFO=<ID=DPRA,Number=A,Type=Float,Description="Alternate allele depth ratio. Ratio between depth in samples with each called alternate allele and those without.">
##INFO=<ID=ODDS,Number=1,Type=Float,Description="The log odds ratio of the best genotype combination to the second-best.">
##INFO=<ID=GTI,Number=1,Type=Integer,Description="Number of genotyping iterations required to reach convergence or bailout.">
##INFO=<ID=TYPE,Number=A,Type=String,Description="The type of allele, either snp, mnp, ins, del, or complex.">
##INFO=<ID=CIGAR,Number=A,Type=String,Description="The extended CIGAR representation of each alternate allele, with the exception that '=' is replaced by 'M' to ease VCF parsing. Note that INDEL alleles do not have the first matched base (which is provided by default, per the spec) referred to by the CIGAR.">
##INFO=<ID=NUMALT,Number=1,Type=Integer,Description="Number of unique non-reference alleles in called genotypes at this position.">
##INFO=<ID=MEANALT,Number=A,Type=Float,Description="Mean number of unique non-reference allele observations per sample with the corresponding alternate alleles.">
##INFO=<ID=LEN,Number=A,Type=Integer,Description="allele length">
##INFO=<ID=MQM,Number=A,Type=Float,Description="Mean mapping quality of observed alternate alleles">
##INFO=<ID=MQMR,Number=1,Type=Float,Description="Mean mapping quality of observed reference alleles">
##INFO=<ID=PAIRED,Number=A,Type=Float,Description="Proportion of observed alternate alleles which are supported by properly paired read fragments">
##INFO=<ID=PAIREDR,Number=1,Type=Float,Description="Proportion of observed reference alleles which are supported by properly paired read fragments">
##INFO=<ID=MIN,Number=1,Type=Integer,Description="Minimum depth in gVCF output block.">
##INFO=<ID=END,Number=1,Type=Integer,Description="Last position (inclusive) in gVCF output record.">
##FORMAT=<ID=GT,Number=1,Type=String,Description="Genotype">
##FORMAT=<ID=GQ,Number=1,Type=Float,Description="Genotype Quality, the Phred-scaled marginal (or unconditional) probability of the called genotype">
##FORMAT=<ID=GL,Number=G,Type=Float,Description="Genotype Likelihood, log10-scaled likelihoods of the data given the called genotype for each possible genotype generated from the reference and alternate alleles given the sample ploidy">
##FORMAT=<ID=DP,Number=1,Type=Integer,Description="Read Depth">
##FORMAT=<ID=RO,Number=1,Type=Integer,Description="Reference allele observation count">
##FORMAT=<ID=QR,Number=1,Type=Integer,Description="Sum of quality of the reference observations">
##FORMAT=<ID=AO,Number=A,Type=Integer,Description="Alternate allele observation count">
##FORMAT=<ID=QA,Number=A,Type=Integer,Description="Sum of quality of the alternate observations">
##FORMAT=<ID=MIN,Number=1,Type=Integer,Description="Minimum depth in gVCF output block.">
#CHROM	POS	ID	REF	ALT	QUAL	FILTER	INFO	FORMAT	unknown
vb1_example	15	.	G	A	53.1884	.	AB=0.171429;ABP=68.6508;AC=1;AF=0.5;AN=2;AO=12;CIGAR=1X;DP=70;DPB=70;DPRA=0;EPP=3.73412;EPPR=3.60933;GTI=0;LEN=1;MEANALT=1;MQM=60;MQMR=60;NS=1;NUMALT=1;ODDS=12.2471;PAIRED=0;PAIREDR=0;PAO=0;PQA=0;PQR=0;PRO=0;QA=457;QR=2170;RO=58;RPL=0;RPP=29.068;RPPR=128.956;RPR=12;RUN=1;SAF=7;SAP=3.73412;SAR=5;SRF=27;SRP=3.60933;SRR=31;TYPE=snp	GT:DP:RO:QR:AO:QA:GL	0/1:70:58:2170:12:457:-20.4037,0,-174.434
vb1_example	33	.	G	A	7.85936e-06	.	AB=0.129412;ABP=104.405;AC=1;AF=0.5;AN=2;AO=11;CIGAR=1X;DP=85;DPB=85;DPRA=0;EPP=4.78696;EPPR=3.12768;GTI=0;LEN=1;MEANALT=1;MQM=60;MQMR=60;NS=1;NUMALT=1;ODDS=13.2224;PAIRED=0;PAIREDR=0;PAO=0;PQA=0;PQR=0;PRO=0;QA=400;QR=2733;RO=74;RPL=5;RPP=3.20771;RPPR=14.748;RPR=6;RUN=1;SAF=4;SAP=4.78696;SAR=7;SRF=39;SRP=3.47981;SRR=35;TYPE=snp	GT:DP:RO:QR:AO:QA:GL	0/1:85:74:2733:11:400:-10.7484,0,-220.551
vb1_example	42	.	T	G	185.039	.	AB=0.195402;ABP=73.1214;AC=1;AF=0.5;AN=2;AO=17;CIGAR=1X;DP=87;DPB=87;DPRA=0;EPP=3.13803;EPPR=6.1124;GTI=0;LEN=1;MEANALT=1;MQM=60;MQMR=60;NS=1;NUMALT=1;ODDS=42.6067;PAIRED=0;PAIREDR=0;PAO=0;PQA=0;PQR=0;PRO=0;QA=635;QR=2493;RO=70;RPL=9;RPP=3.13803;RPPR=7.47733;RPR=8;RUN=1;SAF=7;SAP=4.1599;SAR=10;SRF=35;SRP=3.0103;SRR=35;TYPE=snp	GT:DP:RO:QR:AO:QA:GL	0/1:87:70:2493:17:635:-31.2912,0,-198.388
vb1_example	58	.	ACCAC	GCCAT,GCCAC	1276.97	.	AB=0.344828,0.413793;ABP=21.2057,8.62618;AC=1,1;AF=0.5,0.5;AN=2;AO=30,36;CIGAR=1X3M1X,1X4M;DP=87;DPB=93.4;DPRA=0,0;EPP=3.29983,11.6962;EPPR=4.74748;GTI=0;LEN=5,1;MEANALT=3,3;MQM=60,60;MQMR=60;NS=1;NUMALT=2;ODDS=89.9644;PAIRED=0,0;PAIREDR=0;PAO=5.5,4;PQA=185,113;PQR=90;PRO=3.5;QA=1105,1320;QR=737;RO=20;RPL=10,22;RPP=10.2485,6.8707;RPPR=6.91895;RPR=20,14;RUN=1,1;SAF=12,16;SAP=5.61607,3.9754;SAR=18,…	GT:DP:RO:QR:AO:QA:GL	1/2:87:20:737:30,36:1105,1320:-135.462,-45.4886,-91.9878,-38.9033,0,-85.6458
vb1_example	72	.	TTTCT	GTTCC	641.969	.	AB=0.366667;ABP=16.9077;AC=1;AF=0.5;AN=2;AO=33;CIGAR=1X3M1X;DP=90;DPB=96.6;DPRA=0;EPP=10.9724;EPPR=4.877;GTI=0;LEN=5;MEANALT=1;MQM=60;MQMR=60;NS=1;NUMALT=1;ODDS=147.819;PAIRED=0;PAIREDR=0;PAO=2;PQA=67;PQR=312;PRO=11;QA=1097;QR=2070;RO=57;RPL=9;RPP=17.8158;RPPR=3.35316;RPR=24;RUN=1;SAF=12;SAP=8.34028;SAR=21;SRF=29;SRP=3.0484;SRR=28;TYPE=complex	GT:DP:RO:QR:AO:QA:GL	0/1:90:57:2070:33:1097:-74.0431,0,-183.579
vb1_example	93	.	T	C	5.45455e-14	.	AB=0.105769;ABP=143.404;AC=1;AF=0.5;AN=2;AO=11;CIGAR=1X;DP=104;DPB=104;DPRA=0;EPP=7.94546;EPPR=3.59403;GTI=0;LEN=1;MEANALT=1;MQM=60;MQMR=60;NS=1;NUMALT=1;ODDS=32.5664;PAIRED=0;PAIREDR=0;PAO=0;PQA=0;PQR=0;PRO=0;QA=424;QR=3531;RO=93;RPL=5;RPP=3.20771;RPPR=4.90158;RPR=6;RUN=1;SAF=5;SAP=3.20771;SAR=6;SRF=43;SRP=4.15441;SRR=50;TYPE=snp	GT:DP:RO:QR:AO:QA:GL	0/1:104:93:3531:11:424:-7.20253,0,-286.581
vb1_example	100	.	C	T	6.72037e-10	.	AB=0.122642;ABP=134.118;AC=1;AF=0.5;AN=2;AO=13;CIGAR=1X;DP=106;DPB=106;DPRA=0;EPP=4.51363;EPPR=12.4515;GTI=0;LEN=1;MEANALT=2;MQM=60;MQMR=60;NS=1;NUMALT=1;ODDS=22.5893;PAIRED=0;PAIREDR=0;PAO=0;PQA=0;PQR=0;PRO=0;QA=458;QR=3390;RO=92;RPL=6;RPP=3.17734;RPPR=3.10471;RPR=7;RUN=1;SAF=6;SAP=3.17734;SAR=7;SRF=41;SRP=5.3706;SRR=51;TYPE=snp	GT:DP:RO:QR:AO:QA:GL	0/1:106:92:3390:13:458:-9.81434,0,-273.504
vb1_example	133	.	C	T	1713.21	.	AB=0.547009;ABP=5.25601;AC=1;AF=0.5;AN=2;AO=64;CIGAR=1X;DP=117;DPB=117;DPRA=0;EPP=7.89611;EPPR=7.18621;GTI=0;LEN=1;MEANALT=2;MQM=60;MQMR=60;NS=1;NUMALT=1;ODDS=285.742;PAIRED=0;PAIREDR=0;PAO=0;PQA=0;PQR=0;PRO=0;QA=2370;QR=1840;RO=52;RPL=35;RPP=4.23175;RPPR=3.0103;RPR=29;RUN=1;SAF=29;SAP=4.23175;SAR=35;SRF=25;SRP=3.17734;SRR=27;TYPE=snp	GT:DP:RO:QR:AO:QA:GL	0/1:117:52:1840:64:2370:-178.453,0,-130.798
vb1_example	143	.	C	A	4.33994e-15	.	AB=0;ABP=0;AC=0;AF=0;AN=2;AO=5;CIGAR=1X;DP=111;DPB=111;DPRA=0;EPP=3.44459;EPPR=4.32138;GTI=0;LEN=1;MEANALT=1;MQM=60;MQMR=60;NS=1;NUMALT=1;ODDS=105.62;PAIRED=0;PAIREDR=0;PAO=0;PQA=0;PQR=0;PRO=0;QA=178;QR=3925;RO=106;RPL=2;RPP=3.44459;RPPR=3.74778;RPR=3;RUN=1;SAF=2;SAP=3.44459;SAR=3;SRF=53;SRP=3.0103;SRR=53;TYPE=snp	GT:DP:RO:QR:AO:QA:GL	0/0:111:106:3925:5:178:0,-17.048,-336.982
vb1_example	150	.	A	G	0	.	AB=0;ABP=0;AC=0;AF=0;AN=2;AO=3;CIGAR=1X;DP=114;DPB=114;DPRA=0;EPP=9.52472;EPPR=6.31642;GTI=0;LEN=1;MEANALT=1;MQM=60;MQMR=60;NS=1;NUMALT=1;ODDS=130.943;PAIRED=0;PAIREDR=0;PAO=0;PQA=0;PQR=0;PRO=0;QA=119;QR=3954;RO=111;RPL=3;RPP=9.52472;RPPR=4.59489;RPR=0;RUN=1;SAF=0;SAP=9.52472;SAR=3;SRF=56;SRP=3.02986;SRR=55;TYPE=snp	GT:DP:RO:QR:AO:QA:GL	0/0:114:111:3954:3:119:0,-23.2222,-344.874
vb1_example	169	.	G	C	390.217	.	AB=0.242991;ABP=64.4001;AC=1;AF=0.5;AN=2;AO=26;CIGAR=1X;DP=107;DPB=107;DPRA=0;EPP=11.3621;EPPR=5.18177;GTI=0;LEN=1;MEANALT=1;MQM=60;MQMR=60;NS=1;NUMALT=1;ODDS=89.8509;PAIRED=0;PAIREDR=0;PAO=0;PQA=0;PQR=0;PRO=0;QA=948;QR=2920;RO=81;RPL=8;RPP=11.3621;RPPR=3.68051;RPR=18;RUN=1;SAF=8;SAP=11.3621;SAR=18;SRF=42;SRP=3.25157;SRR=39;TYPE=snp	GT:DP:RO:QR:AO:QA:GL	0/1:107:81:2920:26:948:-53.4112,0,-230.761
vb1_example	200	.	A	G	6.93087e-15	.	AB=0;ABP=0;AC=0;AF=0;AN=2;AO=10;CIGAR=1X;DP=112;DPB=112;DPRA=0;EPP=3.87889;EPPR=3.7767;GTI=0;LEN=1;MEANALT=1;MQM=60;MQMR=60;NS=1;NUMALT=1;ODDS=60.7252;PAIRED=0;PAIREDR=0;PAO=0;PQA=0;PQR=0;PRO=0;QA=345;QR=3725;RO=102;RPL=6;RPP=3.87889;RPPR=6.07591;RPR=4;RUN=1;SAF=6;SAP=3.87889;SAR=4;SRF=51;SRP=3.0103;SRR=51;TYPE=snp	GT:DP:RO:QR:AO:QA:GL	0/0:112:102:3725:10:345:0,-2.3458,-303.99
vb1_example	205	.	GTCCGGATTA	TTCCAGGCTC,GTCCAGAATC,GTCTGGATTA	1999.84	.	AB=0.0824742,0.14433,0.670103;ABP=149.887,109.592,27.389;AC=0,1,1;AF=0,0.5,0.5;AN=2;AO=8,14,65;CIGAR=1X3M1X1M2X1M1X,4M1X2M1X1M1X,3M1X6M;DP=97;DPB=111;DPRA=0,0,0;EPP=3.0103,3.63072,3.31097;EPPR=3.0103;GTI=0;LEN=10,10,1;MEANALT=3,3,3;MQM=60,60,60;MQMR=60;NS=1;NUMALT=3;ODDS=9.40895;PAIRED=0,0,0;PAIREDR=0;PAO=1,4.5,10.5;PQA=34,162.5,379;PQR=287.5;PRO=8;QA=298,485,2399;QR=351;RO=10;RPL=5,6,32;RPP=4.09…	GT:DP:RO:QR:AO:QA:GL	2/3:97:10:351:8,14,65:298,485,2399:-214.03,-197.418,-225.469,-179.108,-190.281,-208.097,-5.14928,-16.3235,0,-16.9833
vb1_example	227	.	CTGAA	GTGAG,GTGAA	1053.31	.	AB=0.213592,0.398058;ABP=76.3976,12.3076;AC=0,1;AF=0,0.5;AN=2;AO=22,41;CIGAR=1X3M1X,1X4M;DP=103;DPB=104;DPRA=0,0;EPP=3.0103,7.30028;EPPR=3.22745;GTI=0;LEN=5,1;MEANALT=2,2;MQM=60,60;MQMR=60;NS=1;NUMALT=2;ODDS=140.934;PAIRED=0,0;PAIREDR=0;PAO=0,0;PQA=0,0;PQR=94;PRO=3;QA=782,1526;QR=1456;RO=40;RPL=9,21;RPP=4.58955,3.06326;RPPR=3.0103;RPR=13,20;RUN=1,1;SAF=12,25;SAP=3.40511,7.30028;SAR=10,16;SRF=19;S…	GT:DP:RO:QR:AO:QA:GL	0/2:103:40:1456:22,41:782,1526:-111.958,-61.1931,-181.025,0,-62.7511,-114.122
vb1_example	258	.	T	C	4.77691e-15	.	AB=0;ABP=0;AC=0;AF=0;AN=2;AO=5;CIGAR=1X;DP=91;DPB=91;DPRA=0;EPP=3.44459;EPPR=3.91929;GTI=0;LEN=1;MEANALT=1;MQM=60;MQMR=60;NS=1;NUMALT=1;ODDS=78.26;PAIRED=0;PAIREDR=0;PAO=0;PQA=0;PQR=0;PRO=0;QA=192;QR=3010;RO=86;RPL=3;RPP=3.44459;RPPR=22.806;RPR=2;RUN=1;SAF=0;SAP=13.8677;SAR=5;SRF=49;SRP=6.64625;SRR=37;TYPE=snp	GT:DP:RO:QR:AO:QA:GL	0/0:91:86:3010:5:192:0,-9.74622,-253.427
vb1_example	305	.	G	C	550.051	.	AB=0.40625;ABP=7.89611;AC=1;AF=0.5;AN=2;AO=26;CIGAR=1X;DP=64;DPB=64;DPRA=0;EPP=8.35546;EPPR=3.9246;GTI=0;LEN=1;MEANALT=1;MQM=60;MQMR=60;NS=1;NUMALT=1;ODDS=126.654;PAIRED=0;PAIREDR=0;PAO=0;PQA=0;PQR=0;PRO=0;QA=894;QR=1402;RO=38;RPL=12;RPP=3.34437;RPPR=3.0103;RPR=14;RUN=1;SAF=13;SAP=3.0103;SAR=13;SRF=16;SRP=5.06748;SRR=22;TYPE=snp	GT:DP:RO:QR:AO:QA:GL	0/1:64:38:1402:26:894:-61.4754,0,-107.184
vb1_example	320	.	A	G	687.648	.	AB=0.402778;ABP=8.92153;AC=1;AF=0.5;AN=2;AO=29;CIGAR=1X;DP=72;DPB=72;DPRA=0;EPP=3.08518;EPPR=3.46479;GTI=0;LEN=1;MEANALT=1;MQM=60;MQMR=60;NS=1;NUMALT=1;ODDS=158.337;PAIRED=0;PAIREDR=0;PAO=0;PQA=0;PQR=0;PRO=0;QA=1095;QR=1555;RO=43;RPL=16;RPP=3.68421;RPPR=7.10075;RPR=13;RUN=1;SAF=6;SAP=24.6501;SAR=23;SRF=28;SRP=11.5447;SRR=15;TYPE=snp	GT:DP:RO:QR:AO:QA:GL	0/1:72:43:1555:29:1095:-77.1713,0,-118.541
vb1_example	322	.	T	G	16.7958	.	AB=0.162162;ABP=76.3709;AC=1;AF=0.5;AN=2;AO=12;CIGAR=1X;DP=74;DPB=74;DPRA=0;EPP=14.5915;EPPR=3.57068;GTI=0;LEN=1;MEANALT=1;MQM=60;MQMR=60;NS=1;NUMALT=1;ODDS=3.84623;PAIRED=0;PAIREDR=0;PAO=0;PQA=0;PQR=0;PRO=0;QA=446;QR=2283;RO=62;RPL=3;RPP=9.52472;RPPR=3.15039;RPR=9;RUN=1;SAF=11;SAP=21.1059;SAR=1;SRF=25;SRP=8.05372;SRR=37;TYPE=snp	GT:DP:RO:QR:AO:QA:GL	0/1:74:62:2283:12:446:-18.2012,0,-183.398
vb1_example	325	.	G	A	610.036	.	AB=0.36;ABP=15.7786;AC=1;AF=0.5;AN=2;AO=27;CIGAR=1X;DP=75;DPB=75;DPRA=0;EPP=3.09072;EPPR=4.6389;GTI=0;LEN=1;MEANALT=1;MQM=60;MQMR=60;NS=1;NUMALT=1;ODDS=140.466;PAIRED=0;PAIREDR=0;PAO=0;PQA=0;PQR=0;PRO=0;QA=1005;QR=1789;RO=48;RPL=10;RPP=6.95112;RPPR=4.6389;RPR=17;RUN=1;SAF=14;SAP=3.09072;SAR=13;SRF=24;SRP=3.0103;SRR=24;TYPE=snp	GT:DP:RO:QR:AO:QA:GL	0/1:75:48:1789:27:1005:-68.1698,0,-138.683
vb1_example	335	.	A	C	0	.	AB=0;ABP=0;AC=0;AF=0;AN=2;AO=4;CIGAR=1X;DP=81;DPB=81;DPRA=0;EPP=5.18177;EPPR=11.1604;GTI=0;LEN=1;MEANALT=1;MQM=60;MQMR=60;NS=1;NUMALT=1;ODDS=73.339;PAIRED=0;PAIREDR=0;PAO=0;PQA=0;PQR=0;PRO=0;QA=155;QR=2844;RO=77;RPL=3;RPP=5.18177;RPPR=15.4469;RPR=1;RUN=1;SAF=2;SAP=3.0103;SAR=2;SRF=39;SRP=3.0385;SRR=38;TYPE=snp	GT:DP:RO:QR:AO:QA:GL	0/0:81:77:2844:4:155:0,-10.0583,-241.795
vb1_example	338	.	A	G	3.37538e-15	.	AB=0;ABP=0;AC=0;AF=0;AN=2;AO=7;CIGAR=1X;DP=86;DPB=86;DPRA=0;EPP=10.7656;EPPR=17.5509;GTI=0;LEN=1;MEANALT=1;MQM=60;MQMR=60;NS=1;NUMALT=1;ODDS=53.3659;PAIRED=0;PAIREDR=0;PAO=0;PQA=0;PQR=0;PRO=0;QA=257;QR=2868;RO=79;RPL=2;RPP=5.80219;RPPR=12.9331;RPR=5;RUN=1;SAF=3;SAP=3.32051;SAR=4;SRF=41;SRP=3.25768;SRR=38;TYPE=snp	GT:DP:RO:QR:AO:QA:GL	0/0:86:79:2868:7:257:0,-2.40794,-234.804
vb1_example	349	.	A	G	158.995	.	AB=0.189474;ABP=82.5776;AC=1;AF=0.5;AN=2;AO=18;CIGAR=1X;DP=95;DPB=95;DPRA=0;EPP=10.7311;EPPR=15.4469;GTI=0;LEN=1;MEANALT=1;MQM=60;MQMR=60;NS=1;NUMALT=1;ODDS=36.61;PAIRED=0;PAIREDR=0;PAO=0;PQA=0;PQR=0;PRO=0;QA=685;QR=2798;RO=77;RPL=4;RPP=15.074;RPPR=7.77626;RPR=14;RUN=1;SAF=15;SAP=20.3821;SAR=3;SRF=37;SRP=3.26411;SRR=40;TYPE=snp	GT:DP:RO:QR:AO:QA:GL	0/1:95:77:2798:18:685:-33.3769,0,-223.391
vb1_example	375	.	A	C	400.856	.	AB=0.25;ABP=57.2971;AC=1;AF=0.5;AN=2;AO=25;CIGAR=1X;DP=100;DPB=100;DPRA=0;EPP=3.09716;EPPR=4.429;GTI=0;LEN=1;MEANALT=1;MQM=60;MQMR=60;NS=1;NUMALT=1;ODDS=92.3006;PAIRED=0;PAIREDR=0;PAO=0;PQA=0;PQR=0;PRO=0;QA=940;QR=2743;RO=75;RPL=10;RPP=5.18177;RPPR=3.03925;RPR=15;RUN=1;SAF=22;SAP=34.3664;SAR=3;SRF=38;SRP=3.03925;SRR=37;TYPE=snp	GT:DP:RO:QR:AO:QA:GL	0/1:100:75:2743:25:940:-54.789,0,-216.914
vb1_example	390	.	A	G	357.336	.	AB=0.221239;ABP=79.2809;AC=1;AF=0.5;AN=2;AO=25;CIGAR=1X;DP=113;DPB=113;DPRA=0;EPP=3.09716;EPPR=4.58955;GTI=0;LEN=1;MEANALT=1;MQM=60;MQMR=60;NS=1;NUMALT=1;ODDS=82.2796;PAIRED=0;PAIREDR=0;PAO=0;PQA=0;PQR=0;PRO=0;QA=923;QR=3267;RO=88;RPL=13;RPP=3.09716;RPPR=3.109;RPR=12;RUN=1;SAF=11;SAP=3.79203;SAR=14;SRF=57;SRP=19.6912;SRR=31;TYPE=snp	GT:DP:RO:QR:AO:QA:GL	0/1:113:88:3267:25:923:-49.3565,0,-260.156
vb1_example	394	.	C	T	0	.	AB=0;ABP=0;AC=0;AF=0;AN=2;AO=7;CIGAR=1X;DP=114;DPB=114;DPRA=0;EPP=3.32051;EPPR=7.57648;GTI=0;LEN=1;MEANALT=1;MQM=60;MQMR=60;NS=1;NUMALT=1;ODDS=90.3604;PAIRED=0;PAIREDR=0;PAO=0;PQA=0;PQR=0;PRO=0;QA=256;QR=3921;RO=107;RPL=5;RPP=5.80219;RPPR=3.03059;RPR=2;RUN=1;SAF=1;SAP=10.7656;SAR=6;SRF=68;SRP=20.0777;SRR=39;TYPE=snp	GT:DP:RO:QR:AO:QA:GL	0/0:114:107:3921:7:256:0,-10.9297,-329.603
vb1_example	395	.	GG	TT,AG	1263.87	.	AB=0.110169,0.432203;ABP=158.767,7.72129;AC=0,1;AF=0,0.5;AN=2;AO=13,51;CIGAR=2X,1X1M;DP=118;DPB=120.5;DPRA=0,0;EPP=4.51363,12.5903;EPPR=3.6537;GTI=0;LEN=2,1;MEANALT=2,2;MQM=60,60;MQMR=60;NS=1;NUMALT=2;ODDS=276.674;PAIRED=0,0;PAIREDR=0;PAO=1,1.5;PQA=35,0;PQR=33;PRO=2.5;QA=411,1865;QR=2003;RO=54;RPL=9,26;RPP=7.18621,3.05288;RPPR=4.45795;RPR=4,25;RUN=1,1;SAF=6,32;SAP=3.17734,10.206;SAR=7,19;SRF=33;S…	GT:DP:RO:QR:AO:QA:GL	0/2:118:54:2003:13,51:411,1865:-134.048,-116.512,-275.231,0,-130.686,-149.426
vb1_example	414	.	TGGAG	AGGAA,TGGAA	1254.17	.	AB=0.147826,0.443478;ABP=126.898,6.20142;AC=0,1;AF=0,0.5;AN=2;AO=17,51;CIGAR=1X3M1X,4M1X;DP=115;DPB=121.4;DPRA=0,0;EPP=3.13803,10.206;EPPR=15.095;GTI=0;LEN=5,1;MEANALT=3,3;MQM=60,59.7843;MQMR=60;NS=1;NUMALT=2;ODDS=176.036;PAIRED=0,0;PAIREDR=0;PAO=6.5,4;PQA=231.5,138.5;PQR=46;PRO=1.5;QA=603,1855;QR=1655;RO=46;RPL=8,21;RPP=3.13803,6.45911;RPPR=3.19912;RPR=9,30;RUN=1,1;SAF=8,24;SAP=3.13803,3.3935;SA…	GT:DP:RO:QR:AO:QA:GL	0/2:115:46:1655:17,51:603,1855:-132.517,-91.0596,-214.756,0,-74.6074,-114.859
vb1_example	461	.	G	C	1012.92	.	AB=0.371901;ABP=20.2565;AC=1;AF=0.5;AN=2;AO=45;CIGAR=1X;DP=121;DPB=121;DPRA=0;EPP=13.8677;EPPR=14.4391;GTI=0;LEN=1;MEANALT=1;MQM=50.3111;MQMR=60;NS=1;NUMALT=1;ODDS=233.233;PAIRED=0;PAIREDR=0;PAO=0;PQA=0;PQR=0;PRO=0;QA=1725;QR=2867;RO=76;RPL=26;RPP=5.37479;RPPR=7.12467;RPR=19;RUN=1;SAF=20;SAP=4.21667;SAR=25;SRF=42;SRP=4.83891;SRR=34;TYPE=snp	GT:DP:RO:QR:AO:QA:GL	0/1:121:76:2867:45:1725:-110.375,0,-221.759
vb1_example	466	.	AT	AATTTT,AA	432.953	.	AB=0.241667,0.108333;ABP=72.5698,162.903;AC=1,0;AF=0.5,0;AN=2;AO=29,13;CIGAR=1M4I1M,1M1X;DP=120;DPB=178.5;DPRA=0,0;EPP=9.07545,7.18621;EPPR=10.3247;GTI=0;LEN=4,1;MEANALT=4,4;MQM=44.9655,60;MQMR=60;NS=1;NUMALT=2;ODDS=99.6911;PAIRED=0,0;PAIREDR=0;PAO=0.5,0;PQA=0,0;PQR=0;PRO=0.5;QA=1039,484;QR=2738;RO=76;RPL=13,13;RPP=3.68421,31.2394;RPPR=4.03889;RPR=16,0;RUN=1,1;SAF=16,4;SAP=3.68421,7.18621;SAR=13,…	GT:DP:RO:QR:AO:QA:GL	0/1:120:76:2738:29,13:1039,484:-54.3161,0,-214.066,-38.1691,-183.784,-256.462
vb1_example	470	.	T	C	443.76	.	AB=0.25;ABP=68.1545;AC=1;AF=0.5;AN=2;AO=30;CIGAR=1X;DP=120;DPB=120;DPRA=0;EPP=10.2485;EPPR=12.6613;GTI=0;LEN=1;MEANALT=1;MQM=44.5333;MQMR=59.8333;NS=1;NUMALT=1;ODDS=102.18;PAIRED=0;PAIREDR=0;PAO=0;PQA=0;PQR=0;PRO=0;QA=1148;QR=3451;RO=90;RPL=13;RPP=4.16842;RPPR=7.73928;RPR=17;RUN=1;SAF=17;SAP=4.16842;SAR=13;SRF=47;SRP=3.39634;SRR=43;TYPE=snp	GT:DP:RO:QR:AO:QA:GL	0/1:120:90:3451:30:1148:-57.7281,0,-274.505
vb1_example	477	.	A	T	0	.	AB=0;ABP=0;AC=0;AF=0;AN=2;AO=2;CIGAR=1X;DP=103;DPB=103;DPRA=0;EPP=7.35324;EPPR=14.3837;GTI=0;LEN=1;MEANALT=1;MQM=60;MQMR=55.2574;NS=1;NUMALT=1;ODDS=127.898;PAIRED=0;PAIREDR=0;PAO=0;PQA=0;PQR=0;PRO=0;QA=69;QR=3695;RO=101;RPL=2;RPP=7.35324;RPPR=3.2038;RPR=0;RUN=1;SAF=2;SAP=7.35324;SAR=0;SRF=58;SRP=7.84774;SRR=43;TYPE=snp	GT:DP:RO:QR:AO:QA:GL	0/0:103:101:3695:2:69:0,-24.4534,-317.039
vb1_example	479	.	ATATATTTTTTA	ATGTATTTTTTTTA,GTGTATTTTTTTA,ATATATTTTTTTA	1465.66	.	AB=0.345679,0.308642,0.320988;ABP=19.7655,28.7731,25.5561;AC=1,1,0;AF=0.5,0.5,0;AN=2;AO=28,25,26;CIGAR=1M2I3M1X7M,1X1M1X2M1I7M,5M1I7M;DP=81;DPB=104.167;DPRA=0,0,0;EPP=5.80219,10.0459,3.0103;EPPR=0;GTI=0;LEN=14,13,1;MEANALT=4,4,4;MQM=43.4286,60,59.4231;MQMR=0;NS=1;NUMALT=3;ODDS=7.56847;PAIRED=0,0,0;PAIREDR=0;PAO=4.83333,8,5.33333;PQA=172.25,294.75,199.25;PQR=182.75;PRO=4.83333;QA=945,861,951;QR=0;…	GT:DP:RO:QR:AO:QA:GL	1/2:81:0:0:28,25,26:945,861,951:-160.855,-91.286,-69.8578,-85.2612,0,-62.2758,-95.6026,-14.2941,-7.59771,-75.4336
vb1_example	506	.	A	G	6.18681e-14	.	AB=0.120879;ABP=116.619;AC=1;AF=0.5;AN=2;AO=11;CIGAR=1X;DP=91;DPB=91;DPRA=0;EPP=3.20771;EPPR=5.23675;GTI=0;LEN=1;MEANALT=2;MQM=40.0909;MQMR=55.7342;NS=1;NUMALT=1;ODDS=39.0514;PAIRED=0;PAIREDR=0;PAO=0;PQA=0;PQR=0;PRO=0;QA=377;QR=2474;RO=79;RPL=9;RPP=12.6832;RPPR=3.69747;RPR=2;RUN=1;SAF=6;SAP=3.20771;SAR=5;SRF=53;SRP=23.0483;SRR=26;TYPE=snp	GT:DP:RO:QR:AO:QA:GL	0/1:91:79:2474:11:377:-1.37811,0,-191.179
vb1_example	516	.	CTAT	GAAG	317.533	.	AB=0.30137;ABP=28.0269;AC=1;AF=0.5;AN=2;AO=22;CIGAR=2X1M1X;DP=73;DPB=74.25;DPRA=0;EPP=4.58955;EPPR=7.35324;GTI=0;LEN=4;MEANALT=2;MQM=52;MQMR=60;NS=1;NUMALT=1;ODDS=73.1146;PAIRED=0;PAIREDR=0;PAO=0;PQA=0;PQR=115;PRO=3;QA=757;QR=1752;RO=50;RPL=17;RPP=17.2236;RPPR=4.57376;RPR=5;RUN=1;SAF=14;SAP=6.56362;SAR=8;SRF=32;SRP=11.5225;SRR=18;TYPE=complex	GT:DP:RO:QR:AO:QA:GL	0/1:73:50:1752:22:757:-41.4202,0,-145.689
vb1_example	531	.	TT	GA	256.123	.	AB=0.27027;ABP=36.9322;AC=1;AF=0.5;AN=2;AO=20;CIGAR=2X;DP=74;DPB=75;DPRA=0;EPP=13.8677;EPPR=3.05127;GTI=0;LEN=2;MEANALT=2;MQM=52.5;MQMR=60;NS=1;NUMALT=1;ODDS=58.9746;PAIRED=0;PAIREDR=0;PAO=1;PQA=31;PQR=36;PRO=1;QA=671;QR=1851;RO=53;RPL=17;RPP=24.2907;RPPR=3.37904;RPR=3;RUN=1;SAF=12;SAP=4.74748;SAR=8;SRF=33;SRP=9.93443;SRR=20;TYPE=mnp	GT:DP:RO:QR:AO:QA:GL	0/1:74:53:1851:20:671:-37.6684,0,-147.299
vb1_example	535	.	GAAAAAAAAAAAT	GAAAAAAAAAAT,GAAAAAAAAAAAAT	377.04	.	AB=0.421875,0.15625;ABP=6.40323,68.6973;AC=1,0;AF=0.5,0;AN=2;AO=27,10;CIGAR=1M1D11M,1M1I12M;DP=64;DPB=78.7692;DPRA=0,0;EPP=9.52472,3.87889;EPPR=6.01695;GTI=0;LEN=1,1;MEANALT=3,3;MQM=58.7037,60;MQMR=57.5;NS=1;NUMALT=2;ODDS=86.8166;PAIRED=0,0;PAIREDR=0;PAO=7.66667,9.66667;PQA=269,337.5;PQR=337.5;PRO=9.66667;QA=926,316;QR=935;RO=26;RPL=15,5;RPP=3.73412,3.0103;RPPR=3.0103;RPR=12,5;RUN=1,1;SAF=15,7;SA…	GT:DP:RO:QR:AO:QA:GL	0/1:64:26:935:27,10:926,316:-43.9025,0,-44.294,-49.5102,-50.4454,-99.1395
vb1_example	550	.	G	A	9.13121e-15	.	AB=0;ABP=0;AC=0;AF=0;AN=2;AO=7;CIGAR=1X;DP=76;DPB=76;DPRA=0;EPP=3.32051;EPPR=8.32883;GTI=0;LEN=1;MEANALT=1;MQM=55;MQMR=59.9275;NS=1;NUMALT=1;ODDS=42.5091;PAIRED=0;PAIREDR=0;PAO=0;PQA=0;PQR=0;PRO=0;QA=255;QR=2378;RO=69;RPL=1;RPP=10.7656;RPPR=3.79707;RPR=6;RUN=1;SAF=4;SAP=3.32051;SAR=3;SRF=41;SRP=8.32883;SRR=28;TYPE=snp	GT:DP:RO:QR:AO:QA:GL	0/0:76:69:2378:7:255:0,-0.534484,-191.883
vb1_example	557	.	G	A,T	429.428	.	AB=0.121951,0.280488;ABP=104.805,37.3302;AC=0,1;AF=0,0.5;AN=2;AO=10,23;CIGAR=1X,1X;DP=82;DPB=82;DPRA=0,0;EPP=3.0103,18.9659;EPPR=4.11819;GTI=0;LEN=1,1;MEANALT=2,2;MQM=56.5,59.7826;MQMR=60;NS=1;NUMALT=2;ODDS=94.1895;PAIRED=0,0;PAIREDR=0;PAO=0,0;PQA=0,0;PQR=0;PRO=0;QA=367,846;QR=1756;RO=49;RPL=1,4;RPP=16.9077,24.253;RPPR=3.40914;RPR=9,19;RUN=1,1;SAF=6,14;SAP=3.87889,5.3706;SAR=4,9;SRF=27;SRP=4.1181…	GT:DP:RO:QR:AO:QA:GL	0/2:82:49:1756:10,23:367,846:-54.4112,-40.1044,-180.265,0,-114.119,-136.255
vb1_example	636	.	A	G	2903.2	.	AB=0.877193;ABP=143.889;AC=1;AF=0.5;AN=2;AO=100;CIGAR=1X;DP=114;DPB=114;DPRA=0;EPP=3.0103;EPPR=3.0103;GTI=0;LEN=1;MEANALT=1;MQM=60;MQMR=60;NS=1;NUMALT=1;ODDS=15.2404;PAIRED=0;PAIREDR=0;PAO=0;PQA=0;PQR=0;PRO=0;QA=3782;QR=539;RO=14;RPL=50;RPP=3.0103;RPPR=5.49198;RPR=50;RUN=1;SAF=44;SAP=6.13722;SAR=56;SRF=8;SRP=3.63072;SRR=6;TYPE=snp	GT:DP:RO:QR:AO:QA:GL	0/1:114:14:539:100:3782:-306.131,0,-14.5323
vb1_example	644	.	G	A	49.0986	.	AB=0.154545;ABP=117.032;AC=1;AF=0.5;AN=2;AO=17;CIGAR=1X;DP=110;DPB=110;DPRA=0;EPP=4.1599;EPPR=3.03365;GTI=0;LEN=1;MEANALT=1;MQM=60;MQMR=60;NS=1;NUMALT=1;ODDS=11.3053;PAIRED=0;PAIREDR=0;PAO=0;PQA=0;PQR=0;PRO=0;QA=618;QR=3489;RO=93;RPL=7;RPP=4.1599;RPPR=8.26386;RPR=10;RUN=1;SAF=8;SAP=3.13803;SAR=9;SRF=44;SRP=3.59403;SRR=49;TYPE=snp	GT:DP:RO:QR:AO:QA:GL	0/1:110:93:3489:17:618:-22.8255,0,-281.001
vb1_example	651	.	G	A	2941.65	.	AB=0.908257;ABP=160.811;AC=1;AF=0.5;AN=2;AO=99;CIGAR=1X;DP=109;DPB=109;DPRA=0;EPP=3.55865;EPPR=3.87889;GTI=0;LEN=1;MEANALT=1;MQM=60;MQMR=60;NS=1;NUMALT=1;ODDS=46.7818;PAIRED=0;PAIREDR=0;PAO=0;PQA=0;PQR=0;PRO=0;QA=3684;QR=395;RO=10;RPL=56;RPP=6.71716;RPPR=6.48466;RPR=43;RUN=1;SAF=46;SAP=4.08507;SAR=53;SRF=5;SRP=3.0103;SRR=5;TYPE=snp	GT:DP:RO:QR:AO:QA:GL	0/1:109:10:395:99:3684:-298.85,0,-3.09351
vb1_example	662	.	A	T	2709.83	.	AB=0.855856;ABP=125.102;AC=1;AF=0.5;AN=2;AO=95;CIGAR=1X;DP=111;DPB=111;DPRA=0;EPP=3.58174;EPPR=3.15506;GTI=0;LEN=1;MEANALT=2;MQM=60;MQMR=60;NS=1;NUMALT=1;ODDS=7.27953;PAIRED=0;PAIREDR=0;PAO=0;PQA=0;PQR=0;PRO=0;QA=3576;QR=546;RO=15;RPL=51;RPP=4.13032;RPPR=3.15506;RPR=44;RUN=1;SAF=43;SAP=4.86177;SAR=52;SRF=7;SRP=3.15506;SRR=8;TYPE=snp	GT:DP:RO:QR:AO:QA:GL	0/1:111:15:546:95:3576:-288.479,0,-16.0022
vb1_example	678	.	G	A	2.1097e-15	.	AB=0;ABP=0;AC=0;AF=0;AN=2;AO=5;CIGAR=1X;DP=125;DPB=125;DPRA=0;EPP=3.44459;EPPR=3.66174;GTI=0;LEN=1;MEANALT=1;MQM=60;MQMR=60;NS=1;NUMALT=1;ODDS=123.647;PAIRED=0;PAIREDR=0;PAO=0;PQA=0;PQR=0;PRO=0;QA=185;QR=4411;RO=120;RPL=4;RPP=6.91895;RPPR=4.16842;RPR=1;RUN=1;SAF=2;SAP=3.44459;SAR=3;SRF=47;SRP=15.2429;SRR=73;TYPE=snp	GT:DP:RO:QR:AO:QA:GL	0/0:125:120:4411:5:185:0,-20.6242,-380.058
vb1_example	686	.	G	C	746.342	.	AB=0.293233;ABP=52.3991;AC=1;AF=0.5;AN=2;AO=39;CIGAR=1X;DP=133;DPB=133;DPRA=0;EPP=5.73856;EPPR=3.0103;GTI=0;LEN=1;MEANALT=1;MQM=60;MQMR=60;NS=1;NUMALT=1;ODDS=171.852;PAIRED=0;PAIREDR=0;PAO=0;PQA=0;PQR=0;PRO=0;QA=1421;QR=3473;RO=94;RPL=10;RPP=23.1103;RPPR=3.37991;RPR=29;RUN=1;SAF=16;SAP=5.73856;SAR=23;SRF=42;SRP=5.32038;SRR=52;TYPE=snp	GT:DP:RO:QR:AO:QA:GL	0/1:133:94:3473:39:1421:-88.109,0,-272.664
vb1_example	725	.	G	C	1334.09	.	AB=0.449153;ABP=5.66023;AC=1;AF=0.5;AN=2;AO=53;CIGAR=1X;DP=118;DPB=118;DPRA=0;EPP=7.96781;EPPR=4.64726;GTI=0;LEN=1;MEANALT=1;MQM=60;MQMR=60;NS=1;NUMALT=1;ODDS=307.186;PAIRED=0;PAIREDR=0;PAO=0;PQA=0;PQR=0;PRO=0;QA=1952;QR=2449;RO=65;RPL=27;RPP=3.05127;RPPR=12.665;RPR=26;RUN=1;SAF=23;SAP=5.01789;SAR=30;SRF=29;SRP=4.64726;SRR=36;TYPE=snp	GT:DP:RO:QR:AO:QA:GL	0/1:118:65:2449:53:1952:-140.386,0,-185.078
vb1_example	764	.	T	G	3685.07	.	AB=0;ABP=0;AC=2;AF=1;AN=2;AO=123;CIGAR=1X;DP=132;DPB=132;DPRA=0;EPP=4.44029;EPPR=3.25157;GTI=0;LEN=1;MEANALT=1;MQM=60;MQMR=60;NS=1;NUMALT=1;ODDS=94.8642;PAIRED=0;PAIREDR=0;PAO=0;PQA=0;PQR=0;PRO=0;QA=4432;QR=319;RO=9;RPL=60;RPP=3.16919;RPPR=5.18177;RPR=63;RUN=1;SAF=62;SAP=3.02795;SAR=61;SRF=3;SRP=5.18177;SRR=6;TYPE=snp	GT:DP:RO:QR:AO:QA:GL	1/1:132:9:319:123:4432:-369.919,-10.6885,0

## Sheet: dna_haplotypes_10bp_windw_line6
##fileformat=VCFv4.1
##fileDate=20181009
##source=freeBayes v1.0.2
##reference=tcr_vb1_example.fa
##phasing=none
##commandline="freebayes -f tcr_vb1_example.fa -p 5 -F 0.01 -C 2 --pooled-continuous --haplotype-length 10 realigned_sorted_igv_6_vb1.bam"
##INFO=<ID=NS,Number=1,Type=Integer,Description="Number of samples with data">
##INFO=<ID=DP,Number=1,Type=Integer,Description="Total read depth at the locus">
##INFO=<ID=DPB,Number=1,Type=Float,Description="Total read depth per bp at the locus; bases in reads overlapping / bases in haplotype">
##INFO=<ID=AC,Number=A,Type=Integer,Description="Total number of alternate alleles in called genotypes">
##INFO=<ID=AN,Number=1,Type=Integer,Description="Total number of alleles in called genotypes">
##INFO=<ID=AF,Number=A,Type=Float,Description="Estimated allele frequency in the range (0,1]">
##INFO=<ID=RO,Number=1,Type=Integer,Description="Reference allele observation count, with partial observations recorded fractionally">
##INFO=<ID=AO,Number=A,Type=Integer,Description="Alternate allele observations, with partial observations recorded fractionally">
##INFO=<ID=PRO,Number=1,Type=Float,Description="Reference allele observation count, with partial observations recorded fractionally">
##INFO=<ID=PAO,Number=A,Type=Float,Description="Alternate allele observations, with partial observations recorded fractionally">
##INFO=<ID=QR,Number=1,Type=Integer,Description="Reference allele quality sum in phred">
##INFO=<ID=QA,Number=A,Type=Integer,Description="Alternate allele quality sum in phred">
##INFO=<ID=PQR,Number=1,Type=Float,Description="Reference allele quality sum in phred for partial observations">
##INFO=<ID=PQA,Number=A,Type=Float,Description="Alternate allele quality sum in phred for partial observations">
##INFO=<ID=SRF,Number=1,Type=Integer,Description="Number of reference observations on the forward strand">
##INFO=<ID=SRR,Number=1,Type=Integer,Description="Number of reference observations on the reverse strand">
##INFO=<ID=SAF,Number=A,Type=Integer,Description="Number of alternate observations on the forward strand">
##INFO=<ID=SAR,Number=A,Type=Integer,Description="Number of alternate observations on the reverse strand">
##INFO=<ID=SRP,Number=1,Type=Float,Description="Strand balance probability for the reference allele: Phred-scaled upper-bounds estimate of the probability of observing the deviation between SRF and SRR given E(SRF/SRR) ~ 0.5, derived using Hoeffding's inequality">
##INFO=<ID=SAP,Number=A,Type=Float,Description="Strand balance probability for the alternate allele: Phred-scaled upper-bounds estimate of the probability of observing the deviation between SAF and SAR given E(SAF/SAR) ~ 0.5, derived using Hoeffding's inequality">
##INFO=<ID=AB,Number=A,Type=Float,Description="Allele balance at heterozygous sites: a number between 0 and 1 representing the ratio of reads showing the reference allele to all reads, considering only reads from individuals called as heterozygous">
##INFO=<ID=ABP,Number=A,Type=Float,Description="Allele balance probability at heterozygous sites: Phred-scaled upper-bounds estimate of the probability of observing the deviation between ABR and ABA given E(ABR/ABA) ~ 0.5, derived using Hoeffding's inequality">
##INFO=<ID=RUN,Number=A,Type=Integer,Description="Run length: the number of consecutive repeats of the alternate allele in the reference genome">
##INFO=<ID=RPP,Number=A,Type=Float,Description="Read Placement Probability: Phred-scaled upper-bounds estimate of the probability of observing the deviation between RPL and RPR given E(RPL/RPR) ~ 0.5, derived using Hoeffding's inequality">
##INFO=<ID=RPPR,Number=1,Type=Float,Description="Read Placement Probability for reference observations: Phred-scaled upper-bounds estimate of the probability of observing the deviation between RPL and RPR given E(RPL/RPR) ~ 0.5, derived using Hoeffding's inequality">
##INFO=<ID=RPL,Number=A,Type=Float,Description="Reads Placed Left: number of reads supporting the alternate balanced to the left (5') of the alternate allele">
##INFO=<ID=RPR,Number=A,Type=Float,Description="Reads Placed Right: number of reads supporting the alternate balanced to the right (3') of the alternate allele">
##INFO=<ID=EPP,Number=A,Type=Float,Description="End Placement Probability: Phred-scaled upper-bounds estimate of the probability of observing the deviation between EL and ER given E(EL/ER) ~ 0.5, derived using Hoeffding's inequality">
##INFO=<ID=EPPR,Number=1,Type=Float,Description="End Placement Probability for reference observations: Phred-scaled upper-bounds estimate of the probability of observing the deviation between EL and ER given E(EL/ER) ~ 0.5, derived using Hoeffding's inequality">
##INFO=<ID=DPRA,Number=A,Type=Float,Description="Alternate allele depth ratio. Ratio between depth in samples with each called alternate allele and those without.">
##INFO=<ID=ODDS,Number=1,Type=Float,Description="The log odds ratio of the best genotype combination to the second-best.">
##INFO=<ID=GTI,Number=1,Type=Integer,Description="Number of genotyping iterations required to reach convergence or bailout.">
##INFO=<ID=TYPE,Number=A,Type=String,Description="The type of allele, either snp, mnp, ins, del, or complex.">
##INFO=<ID=CIGAR,Number=A,Type=String,Description="The extended CIGAR representation of each alternate allele, with the exception that '=' is replaced by 'M' to ease VCF parsing. Note that INDEL alleles do not have the first matched base (which is provided by default, per the spec) referred to by the CIGAR.">
##INFO=<ID=NUMALT,Number=1,Type=Integer,Description="Number of unique non-reference alleles in called genotypes at this position.">
##INFO=<ID=MEANALT,Number=A,Type=Float,Description="Mean number of unique non-reference allele observations per sample with the corresponding alternate alleles.">
##INFO=<ID=LEN,Number=A,Type=Integer,Description="allele length">
##INFO=<ID=MQM,Number=A,Type=Float,Description="Mean mapping quality of observed alternate alleles">
##INFO=<ID=MQMR,Number=1,Type=Float,Description="Mean mapping quality of observed reference alleles">
##INFO=<ID=PAIRED,Number=A,Type=Float,Description="Proportion of observed alternate alleles which are supported by properly paired read fragments">
##INFO=<ID=PAIREDR,Number=1,Type=Float,Description="Proportion of observed reference alleles which are supported by properly paired read fragments">
##INFO=<ID=MIN,Number=1,Type=Integer,Description="Minimum depth in gVCF output block.">
##INFO=<ID=END,Number=1,Type=Integer,Description="Last position (inclusive) in gVCF output record.">
##FORMAT=<ID=GT,Number=1,Type=String,Description="Genotype">
##FORMAT=<ID=GQ,Number=1,Type=Float,Description="Genotype Quality, the Phred-scaled marginal (or unconditional) probability of the called genotype">
##FORMAT=<ID=GL,Number=G,Type=Float,Description="Genotype Likelihood, log10-scaled likelihoods of the data given the called genotype for each possible genotype generated from the reference and alternate alleles given the sample ploidy">
##FORMAT=<ID=DP,Number=1,Type=Integer,Description="Read Depth">
##FORMAT=<ID=RO,Number=1,Type=Integer,Description="Reference allele observation count">
##FORMAT=<ID=QR,Number=1,Type=Integer,Description="Sum of quality of the reference observations">
##FORMAT=<ID=AO,Number=A,Type=Integer,Description="Alternate allele observation count">
##FORMAT=<ID=QA,Number=A,Type=Integer,Description="Sum of quality of the alternate observations">
##FORMAT=<ID=MIN,Number=1,Type=Integer,Description="Minimum depth in gVCF output block.">
#CHROM	POS	ID	REF	ALT	QUAL	FILTER	INFO	FORMAT	unknown
vb1_example	33	.	GTCATTG	ATCATTA	2.75884e-06	.	AB=0.0470588;ABP=305.943;AC=1;AF=0.2;AN=5;AO=8;CIGAR=1X5M1X;DP=170;DPB=179.857;DPRA=0;EPP=7.35324;EPPR=3.06459;GTI=0;LEN=7;MEANALT=3;MQM=60;MQMR=60;NS=1;NUMALT=1;ODDS=14.2693;PAIRED=0;PAIREDR=0;PAO=1;PQA=34;PQR=615;PRO=21;QA=294;QR=5864;RO=160;RPL=2;RPP=7.35324;RPPR=65.7659;RPR=6;RUN=1;SAF=6;SAP=7.35324;SAR=2;SRF=63;SRP=18.6992;SRR=97;TYPE=complex	GT:DP:RO:QR:AO:QA	0/0/0/0/1:170:160:5864:8:294
vb1_example	42	.	T	G	868.826	.	AB=0.217617;ABP=136.685;AC=1;AF=0.2;AN=5;AO=42;CIGAR=1X;DP=193;DPB=193;DPRA=0;EPP=4.87156;EPPR=9.35215;GTI=0;LEN=1;MEANALT=1;MQM=60;MQMR=60;NS=1;NUMALT=1;ODDS=29.0611;PAIRED=0;PAIREDR=0;PAO=0;PQA=0;PQR=0;PRO=0;QA=1536;QR=5401;RO=151;RPL=11;RPP=23.691;RPPR=29.6001;RPR=31;RUN=1;SAF=17;SAP=6.31921;SAR=25;SRF=66;SRP=8.2017;SRR=85;TYPE=snp	GT:DP:RO:QR:AO:QA	0/0/0/0/1:193:151:5401:42:1536
vb1_example	58	.	ACCACTGATAAGGATTTCT	GCCATTGATAAGGATTTCT,GCCATTGATAAGGAGTTCC,GCCACTGATAAGGATTTCT	5357.02	.	AB=0.526012,0.421965,0.0404624;ABP=4.027,12.1606,320.334;AC=3,2,0;AF=0.6,0.4,0;AN=5;AO=91,73,7;CIGAR=1X3M1X14M,1X3M1X9M1X3M1X,1X18M;DP=173;DPB=209.158;DPRA=0,0,0;EPP=4.17955,3.27802,10.7656;EPPR=5.18177;GTI=0;LEN=19,19,1;MEANALT=4,4,4;MQM=60,60,60;MQMR=60;NS=1;NUMALT=3;ODDS=18.2459;PAIRED=0,0,0;PAIREDR=0;PAO=22.8333,40.5,6.33333;PQA=806.833,1414.83,219.333;PQR=111;PRO=3.33333;QA=3298,2581,267;QR=…	GT:DP:RO:QR:AO:QA	1/1/1/2/2:173:1:28:91,73,7:3298,2581,267
vb1_example	93	.	T	C	1047.89	.	AB=0.228571;ABP=137.393;AC=1;AF=0.2;AN=5;AO=48;CIGAR=1X;DP=210;DPB=210;DPRA=0;EPP=11.8771;EPPR=7.35324;GTI=0;LEN=1;MEANALT=1;MQM=60;MQMR=60;NS=1;NUMALT=1;ODDS=27.0723;PAIRED=0;PAIREDR=0;PAO=0;PQA=0;PQR=0;PRO=0;QA=1797;QR=6091;RO=162;RPL=33;RPP=17.6677;RPPR=3.0103;RPR=15;RUN=1;SAF=28;SAP=5.9056;SAR=20;SRF=85;SRP=3.86817;SRR=77;TYPE=snp	GT:DP:RO:QR:AO:QA	0/0/0/0/1:210:162:6091:48:1797
vb1_example	133	.	CTACCTTCCAC	TTACCTACCAA,TTACCTTCCAA,TTACCTTCCAC,CTACCTACCAC	1807.96	.	AB=0.1875,0.0125,0.35,0.09375;ABP=138.727,333.291,34.2795,232.372;AC=1,0,2,1;AF=0.2,0,0.4,0.2;AN=5;AO=30,2,56,15;CIGAR=1X5M1X3M1X,1X9M1X,1X10M,6M1X4M;DP=160;DPB=177.818;DPRA=0,0,0,0;EPP=4.16842,7.35324,4.40625,6.62942;EPPR=4.40625;GTI=0;LEN=11,11,1,1;MEANALT=5,5,5,5;MQM=60,60,60,60;MQMR=60;NS=1;NUMALT=4;ODDS=5.54518;PAIRED=0,0,0,0;PAIREDR=0;PAO=7.33333,4.83333,7.16667,6.33333;PQA=245.667,167.167,…	GT:DP:RO:QR:AO:QA	0/1/3/3/4:160:56:1978:30,2,56,15:1049,58,2042,552
vb1_example	150	.	A	G	2.1097e-15	.	AB=0;ABP=0;AC=0;AF=0;AN=5;AO=3;CIGAR=1X;DP=159;DPB=159;DPRA=0;EPP=9.52472;EPPR=6.57374;GTI=0;LEN=1;MEANALT=1;MQM=60;MQMR=60;NS=1;NUMALT=1;ODDS=49.0083;PAIRED=0;PAIREDR=0;PAO=0;PQA=0;PQR=0;PRO=0;QA=119;QR=5623;RO=156;RPL=3;RPP=9.52472;RPPR=5.01474;RPR=0;RUN=1;SAF=0;SAP=9.52472;SAR=3;SRF=94;SRP=17.2641;SRR=62;TYPE=snp	GT:DP:RO:QR:AO:QA	0/0/0/0/0:159:156:5623:3:119
vb1_example	167	.	TGGC	AGGT,TGGT	165.471	.	AB=0.115646,0.0952381;ABP=191.633,212.195;AC=1,1;AF=0.2,0.2;AN=5;AO=17,14;CIGAR=1X2M1X,3M1X;DP=147;DPB=156.5;DPRA=0,0;EPP=3.13803,5.49198;EPPR=3.18024;GTI=0;LEN=4,1;MEANALT=3,3;MQM=59.3529,60;MQMR=60;NS=1;NUMALT=2;ODDS=2.31164;PAIRED=0,0;PAIREDR=0;PAO=1.5,6;PQA=51.5,173;PQR=254.5;PRO=9.5;QA=562,414;QR=4024;RO=115;RPL=7,10;RPP=4.1599,8.59409;RPPR=11.3374;RPR=10,4;RUN=1,1;SAF=7,11;SAP=4.1599,12.937…	GT:DP:RO:QR:AO:QA	0/0/0/1/2:147:115:4024:17,14:562,414
vb1_example	182	.	C	G	309.875	.	AB=0.115152;ABP=215.275;AC=1;AF=0.2;AN=5;AO=19;CIGAR=1X;DP=165;DPB=165;DPRA=0;EPP=4.03889;EPPR=3.24827;GTI=0;LEN=1;MEANALT=1;MQM=60;MQMR=59.9247;NS=1;NUMALT=1;ODDS=58.069;PAIRED=0;PAIREDR=0;PAO=0;PQA=0;PQR=0;PRO=0;QA=735;QR=5442;RO=146;RPL=5;RPP=12.2676;RPPR=7.82918;RPR=14;RUN=1;SAF=14;SAP=12.2676;SAR=5;SRF=79;SRP=5.15203;SRR=67;TYPE=snp	GT:DP:RO:QR:AO:QA	0/0/0/0/1:165:146:5442:19:735
vb1_example	200	.	ACATGGTCCGGATTA	GCATGGTCCAGGCTC,ACATGTTCCAGTTTC,ACATGGTCCAGGTTC,ACATGGTCCAGGCTC,ACATGGTCCAGAATC,ACATGGTCGGGATTA,ACATGGTCTGGATTA	2404.46	.	AB=0.110169,0.237288,0.0169492,0.0677966,0.101695,0.254237,0.194915;ABP=158.767,73.7488,242.167,194.468,165.613,64.9157,98.4079;AC=1,1,0,0,0,2,1;AF=0.2,0.2,0,0,0,0.4,0.2;AN=5;AO=13,28,2,8,12,30,23;CIGAR=1X8M1X1M2X1M1X,5M1X3M1X1M1X2M1X,9M1X1M1X2M1X,9M1X1M2X1M1X,9M1X2M1X1M1X,8M1X6M,8M1X6M;DP=118;DPB=146.533;DPRA=0,0,0,0,0,0,0;EPP=4.51363,7.97367,3.0103,4.09604,5.9056,3.29983,3.10471;EPPR=0;GTI=0;LE…	GT:DP:RO:QR:AO:QA	1/2/6/6/7:118:0:0:13,28,2,8,12,30,23:451,1052,72,278,417,1093,842
vb1_example	227	.	CTGAA	GTGAG,GTGAA	2693.23	.	AB=0.319728,0.421769;ABP=44.5046,10.8246;AC=2,2;AF=0.4,0.4;AN=5;AO=47,62;CIGAR=1X3M1X,1X4M;DP=147;DPB=148.2;DPRA=0,0;EPP=4.16534,3.15039;EPPR=3.23888;GTI=0;LEN=5,1;MEANALT=2,2;MQM=60,59.8226;MQMR=60;NS=1;NUMALT=2;ODDS=11.7835;PAIRED=0,0;PAIREDR=0;PAO=1,1.5;PQA=39,55.5;PQR=50.5;PRO=1.5;QA=1644,2297;QR=1395;RO=38;RPL=27,32;RPP=5.27418,3.15039;RPPR=3.23888;RPR=20,30;RUN=1,1;SAF=28,38;SAP=6.75262,9.8…	GT:DP:RO:QR:AO:QA	0/1/1/2/2:147:38:1395:47,62:1644,2297
vb1_example	246	.	A	G	0.00206919	.	AB=0.0540541;ABP=258.657;AC=1;AF=0.2;AN=5;AO=8;CIGAR=1X;DP=148;DPB=148;DPRA=0;EPP=7.35324;EPPR=4.00297;GTI=0;LEN=1;MEANALT=1;MQM=60;MQMR=59.9214;NS=1;NUMALT=1;ODDS=7.64891;PAIRED=0;PAIREDR=0;PAO=0;PQA=0;PQR=0;PRO=0;QA=288;QR=5234;RO=140;RPL=6;RPP=7.35324;RPPR=11.9444;RPR=2;RUN=1;SAF=6;SAP=7.35324;SAR=2;SRF=78;SRP=6.98099;SRR=62;TYPE=snp	GT:DP:RO:QR:AO:QA	0/0/0/0/1:148:140:5234:8:288
vb1_example	305	.	G	C	995.14	.	AB=0.392857;ABP=14.1779;AC=2;AF=0.4;AN=5;AO=44;CIGAR=1X;DP=112;DPB=112;DPRA=0;EPP=19.0002;EPPR=3.04271;GTI=0;LEN=1;MEANALT=2;MQM=60;MQMR=60;NS=1;NUMALT=1;ODDS=18.6514;PAIRED=0;PAIREDR=0;PAO=0;PQA=0;PQR=0;PRO=0;QA=1548;QR=2487;RO=67;RPL=24;RPP=3.79993;RPPR=3.30199;RPR=20;RUN=1;SAF=27;SAP=7.94546;SAR=17;SRF=33;SRP=3.04271;SRR=34;TYPE=snp	GT:DP:RO:QR:AO:QA	0/0/0/1/1:112:67:2487:44:1548
vb1_example	320	.	ACTGTGAGGAATGGAA	GCTGAGAGGAATGGAC,GCTGAGAGGAATGGAA,GCTGTAAGGAATGGAC,GCTGTGAGGAATGGAA,ACGGTGAGGAATGGAA,ACTGTAAGGAATGGAA	1746.41	.	AB=0.0526316,0.0736842,0.0210526,0.421053,0.0210526,0.263158;ABP=168.156,152.979,192.294,8.15326,192.294,49.2969;AC=0,0,0,3,0,1;AF=0,0,0,0.6,0,0.2;AN=5;AO=5,7,2,40,2,25;CIGAR=1X3M1X10M1X,1X3M1X11M,1X4M1X9M1X,1X15M,2M1X13M,5M1X10M;DP=95;DPB=117.875;DPRA=0,0,0,0,0,0;EPP=13.8677,5.80219,7.35324,3.22745,3.0103,3.09716;EPPR=3.17734;GTI=0;LEN=16,16,16,1,1,1;MEANALT=7,7,7,7,7,7;MQM=60,60,60,60,60,60;MQM…	GT:DP:RO:QR:AO:QA	0/4/4/4/6:95:13:480:5,7,2,40,2,25:178,271,80,1518,76,937
vb1_example	349	.	A	C,G	6.37526e-09	.	AB=0.04,0.032;ABP=232.752,240.813;AC=1,0;AF=0.2,0;AN=5;AO=5,4;CIGAR=1X,1X;DP=125;DPB=125;DPRA=0,0;EPP=13.8677,5.18177;EPPR=24.6501;GTI=0;LEN=1,1;MEANALT=2,2;MQM=60,60;MQMR=60;NS=1;NUMALT=2;ODDS=20.3497;PAIRED=0,0;PAIREDR=0;PAO=0,0;PQA=0,0;PQR=0;PRO=0;QA=199,145;QR=4167;RO=116;RPL=0,1;RPP=13.8677,5.18177;RPPR=3.08518;RPR=5,3;RUN=1,1;SAF=5,2;SAP=13.8677,3.0103;SAR=0,2;SRF=70;SRP=13.7928;SRR=46;TYPE…	GT:DP:RO:QR:AO:QA	0/0/0/0/1:125:116:4167:5,4:199,145
vb1_example	354	.	G	A	3.64034e-14	.	AB=0;ABP=0;AC=0;AF=0;AN=5;AO=3;CIGAR=1X;DP=133;DPB=133;DPRA=0;EPP=9.52472;EPPR=41.4955;GTI=0;LEN=1;MEANALT=1;MQM=60;MQMR=60;NS=1;NUMALT=1;ODDS=38.31;PAIRED=0;PAIREDR=0;PAO=0;PQA=0;PQR=0;PRO=0;QA=107;QR=4921;RO=130;RPL=1;RPP=3.73412;RPPR=7.28643;RPR=2;RUN=1;SAF=1;SAP=3.73412;SAR=2;SRF=82;SRP=22.3197;SRR=48;TYPE=snp	GT:DP:RO:QR:AO:QA	0/0/0/0/0:133:130:4921:3:107
vb1_example	372	.	A	T	79.6089	.	AB=0.075;ABP=254.033;AC=1;AF=0.2;AN=5;AO=12;CIGAR=1X;DP=160;DPB=160;DPRA=0;EPP=3.73412;EPPR=3.24505;GTI=0;LEN=1;MEANALT=1;MQM=60;MQMR=60;NS=1;NUMALT=1;ODDS=18.3306;PAIRED=0;PAIREDR=0;PAO=0;PQA=0;PQR=0;PRO=0;QA=442;QR=5566;RO=148;RPL=2;RPP=14.5915;RPPR=16.2152;RPR=10;RUN=1;SAF=5;SAP=3.73412;SAR=7;SRF=89;SRP=16.2152;SRR=59;TYPE=snp	GT:DP:RO:QR:AO:QA	0/0/0/0/1:160:148:5566:12:442
vb1_example	375	.	A	C	901.831	.	AB=0.253012;ABP=90.968;AC=1;AF=0.2;AN=5;AO=42;CIGAR=1X;DP=166;DPB=166;DPRA=0;EPP=8.18047;EPPR=3.0103;GTI=0;LEN=1;MEANALT=1;MQM=60;MQMR=60;NS=1;NUMALT=1;ODDS=13.5263;PAIRED=0;PAIREDR=0;PAO=0;PQA=0;PQR=0;PRO=0;QA=1549;QR=4579;RO=124;RPL=15;RPP=10.4553;RPPR=8.68415;RPR=27;RUN=1;SAF=29;SAP=16.2459;SAR=13;SRF=67;SRP=4.76149;SRR=57;TYPE=snp	GT:DP:RO:QR:AO:QA	0/0/0/0/1:166:124:4579:42:1549
vb1_example	390	.	ATGTCGG	GTGTCTT,ATGTTGG,ATGTCAG	2238.39	.	AB=0.10582,0.248677,0.206349;ABP=258.084,106.701,144.57;AC=1,1,1;AF=0.2,0.2,0.2;AN=5;AO=20,47,39;CIGAR=1X4M2X,4M1X2M,5M1X1M;DP=189;DPB=198.857;DPRA=0,0,0;EPP=13.8677,13.4056,9.74743;EPPR=3.434;GTI=0;LEN=7,1,1;MEANALT=4,4,4;MQM=60,60,60;MQMR=60;NS=1;NUMALT=3;ODDS=51.2929;PAIRED=0,0,0;PAIREDR=0;PAO=1,4.66667,8.66667;PQA=33,116.667,254.667;PQR=272.667;PRO=8.66667;QA=708,1659,1449;QR=2981;RO=82;RPL=9…	GT:DP:RO:QR:AO:QA	0/0/1/2/3:189:82:2981:20,47,39:708,1659,1449
vb1_example	406	.	C	T	1429.7	.	AB=0.280851;ABP=101.041;AC=1;AF=0.2;AN=5;AO=66;CIGAR=1X;DP=235;DPB=235;DPRA=0;EPP=3.53672;EPPR=31.3936;GTI=0;LEN=1;MEANALT=1;MQM=59.9545;MQMR=60;NS=1;NUMALT=1;ODDS=6.14658;PAIRED=0;PAIREDR=0;PAO=0;PQA=0;PQR=0;PRO=0;QA=2439;QR=6131;RO=169;RPL=11;RPP=66.7068;RPPR=11.0409;RPR=55;RUN=1;SAF=36;SAP=4.19474;SAR=30;SRF=95;SRP=8.67669;SRR=74;TYPE=snp	GT:DP:RO:QR:AO:QA	0/0/0/0/1:235:169:6131:66:2439
vb1_example	418	.	G	A	4263.38	.	AB=0.643154;ABP=45.9081;AC=3;AF=0.6;AN=5;AO=155;CIGAR=1X;DP=241;DPB=241;DPRA=0;EPP=4.70545;EPPR=5.53527;GTI=0;LEN=1;MEANALT=1;MQM=59.9806;MQMR=60;NS=1;NUMALT=1;ODDS=29.6344;PAIRED=0;PAIREDR=0;PAO=0;PQA=0;PQR=0;PRO=0;QA=5598;QR=3086;RO=86;RPL=58;RPP=24.3187;RPPR=3.1113;RPR=97;RUN=1;SAF=74;SAP=3.69677;SAR=81;SRF=46;SRP=3.91929;SRR=40;TYPE=snp	GT:DP:RO:QR:AO:QA	0/0/1/1/1:241:86:3086:155:5598
vb1_example	453	.	ATGTACTAG	GTGTACTAC,ATGTAGTAG,ATGTACTAC	4828.2	.	AB=0.191667,0.0958333,0.570833;ABP=201.193,343.533,13.4696;AC=1,1,2;AF=0.2,0.2,0.4;AN=5;AO=46,23,137;CIGAR=1X7M1X,5M1X3M,8M1X;DP=240;DPB=268.667;DPRA=0,0,0;EPP=9.80795,5.3706,8.73221;EPPR=6.44263;GTI=0;LEN=9,1,1;MEANALT=6,6,6;MQM=59.7826,60,57.6861;MQMR=60;NS=1;NUMALT=3;ODDS=40.7864;PAIRED=0,0,0;PAIREDR=0;PAO=7,11.3333,12.8333;PQA=243.5,319,428;PQR=735.5;PRO=22.8333;QA=1654,831,4918;QR=1127;RO=31…	GT:DP:RO:QR:AO:QA	0/1/2/3/3:240:31:1127:46,23,137:1654,831,4918
vb1_example	462	.	TAGTATTTTTTTCT	TATTTTTTTTTTCT,TAGTATTTTTTTTTCT,TAGTATTTTTTTTTTCT,TAGTATTTTTTGTTTTCT,TAGTATTTTTTTCTTTCT	552.49	.	AB=0.0518868,0.0943396,0.165094,0.117925,0.0566038;ABP=372.775,306.033,209.546,271.822,365.032;AC=0,0,1,1,0;AF=0,0,0.2,0.2,0;AN=5;AO=11,20,35,25,12;CIGAR=2M1X1M1X9M,5M2I9M,5M3I9M,8M4I6M,9M4I5M;DP=212;DPB=271.714;DPRA=0,0,0,0,0;EPP=12.6832,3.0103,8.03571,3.09716,3.73412;EPPR=23.2703;GTI=0;LEN=14,2,3,4,4;MEANALT=11,11,11,11,11;MQM=53.5455,58.5,56.2286,55.72,43.25;MQMR=59.7767;NS=1;NUMALT=5;ODDS=34.…	GT:DP:RO:QR:AO:QA	0/0/0/3/4:212:103:3811:11,20,35,25,12:423,681,1234,857,432
vb1_example	479	.	ATATATTTTTTA	ATGTATTTTTTTTA,GTGTATTTTTTTA,ATATAGTTTTTTA,ATATATTTTTTTA,ATATATTTTTTTTA	3986.19	.	AB=0.0618557,0.128866,0.0979381,0.597938,0.0773196;ABP=326.493,235.112,275.407,19.1732,304.061;AC=0,1,1,3,0;AF=0,0.2,0.2,0.6,0;AN=5;AO=12,25,19,116,15;CIGAR=1M2I3M1X7M,1X1M1X2M1I7M,5M1I7M,5M1I7M,5M2I7M;DP=194;DPB=243.5;DPRA=0,0,0,0,0;EPP=3.0103,10.0459,4.03889,12.0706,10.1038;EPPR=0;GTI=0;LEN=14,13,1,1,2;MEANALT=9,9,9,9,9;MQM=43.25,60,54.2105,52.8534,59.2;MQMR=0;NS=1;NUMALT=5;ODDS=15.5174;PAIRED=…	GT:DP:RO:QR:AO:QA	2/3/4/4/4:194:0:0:12,25,19,116,15:419,861,611,4030,508
vb1_example	491	.	A	T	171.108	.	AB=0.0852018;ABP=336.278;AC=1;AF=0.2;AN=5;AO=19;CIGAR=1X;DP=223;DPB=223;DPRA=0;EPP=3.12459;EPPR=3.3935;GTI=0;LEN=1;MEANALT=1;MQM=42.5263;MQMR=54.1471;NS=1;NUMALT=1;ODDS=39.3991;PAIRED=0;PAIREDR=0;PAO=0;PQA=0;PQR=0;PRO=0;QA=692;QR=7460;RO=204;RPL=12;RPP=5.8675;RPPR=6.45911;RPR=7;RUN=1;SAF=9;SAP=3.12459;SAR=10;SRF=116;SRP=11.3556;SRR=88;TYPE=snp	GT:DP:RO:QR:AO:QA	0/0/0/0/1:223:204:7460:19:692
vb1_example	495	.	C	A	219.869	.	AB=0.0981308;ABP=303.201;AC=1;AF=0.2;AN=5;AO=21;CIGAR=1X;DP=214;DPB=214;DPRA=0;EPP=11.386;EPPR=3.56161;GTI=0;LEN=1;MEANALT=1;MQM=50.4762;MQMR=52.8187;NS=1;NUMALT=1;ODDS=50.6266;PAIRED=0;PAIREDR=0;PAO=0;PQA=0;PQR=0;PRO=0;QA=734;QR=6941;RO=193;RPL=13;RPP=5.59539;RPPR=4.37169;RPR=8;RUN=1;SAF=13;SAP=5.59539;SAR=8;SRF=109;SRP=10.0423;SRR=84;TYPE=snp	GT:DP:RO:QR:AO:QA	0/0/0/0/1:214:193:6941:21:734
vb1_example	503	.	A	C	5.37914e-15	.	AB=0;ABP=0;AC=0;AF=0;AN=5;AO=5;CIGAR=1X;DP=206;DPB=206;DPRA=0;EPP=6.91895;EPPR=13.3923;GTI=0;LEN=1;MEANALT=1;MQM=53.8;MQMR=52.2935;NS=1;NUMALT=1;ODDS=85.3514;PAIRED=0;PAIREDR=0;PAO=0;PQA=0;PQR=0;PRO=0;QA=39;QR=6293;RO=201;RPL=0;RPP=13.8677;RPPR=17.8001;RPR=5;RUN=1;SAF=1;SAP=6.91895;SAR=4;SRF=120;SRP=19.4422;SRR=81;TYPE=snp	GT:DP:RO:QR:AO:QA	0/0/0/0/0:206:201:6293:5:39
vb1_example	506	.	ACCCTTGGTTCTAT	ACCCTTGGTTGAAG,CCCCTTGGTTGAAG,ACACTTGGTTGAAG,ACCCTTGATTGAAG	1887.83	.	AB=0.364286,0.0428571,0.207143,0.0857143;ABP=25.4075,257.135,107.303,211.72;AC=2,0,1,1;AF=0.4,0,0.2,0.2;AN=5;AO=51,6,29,12;CIGAR=10M2X1M1X,1X9M2X1M1X,2M1X7M2X1M1X,7M1X2M2X1M1X;DP=140;DPB=187.643;DPRA=0,0,0,0;EPP=25.534,4.45795,4.88226,5.9056;EPPR=24.725;GTI=0;LEN=14,14,14,14;MEANALT=6,6,6,6;MQM=51.1569,37.3333,37.5862,55.0833;MQMR=60;NS=1;NUMALT=4;ODDS=6.0464;PAIRED=0,0,0,0;PAIREDR=0;PAO=18.25,1,…	GT:DP:RO:QR:AO:QA	0/1/1/3/4:140:40:1375:51,6,29,12:1683,154,977,385
vb1_example	520	.	TTTTAAAATGTTTCAGAAAAAAAAAAAT	TTTTAAAATGATTCAGAAAAAAAAAAT,TTTTAAAATGTGACAGAAAAAAAAAAT,TTTTAAAATGTGACAGAAAAAAAAAAAAAT,TTTTAAAATGTGACAGAAAAAAAAAAAAAAT,TTTTAAAATATGACAGAAAAAAAAAAT,TTTTAAAATGTTTCAGAAAAAAAAAAT,TTTTAAAATGTTTCAGAAAAAAAAAAAAAT	928.347	.	AB=0,0,0,0,0,0,0;ABP=0,0,0,0,0,0,0;AC=0,0,0,0,0,5,0;AF=0,0,0,0,0,1,0;AN=5;AO=8,9,7,2,10,31,8;CIGAR=10M1X5M1D11M,11M2X3M1D11M,11M2X3M2I12M,11M2X3M3I12M,9M1X1M2X3M1D11M,16M1D11M,16M2I12M;DP=80;DPB=131.143;DPRA=0,0,0,0,0,0,0;EPP=3.0103,3.25157,18.2106,3.0103,10.8276,3.64073,12.7819;EPPR=0;GTI=0;LEN=27,27,30,31,27,1,2;MEANALT=12,12,12,12,12,12,12;MQM=58.5,43.8889,45.8571,36.5,34.6,59.8387,60;MQMR=0;N…	GT:DP:RO:QR:AO:QA	6/6/6/6/6:80:0:0:8,9,7,2,10,31,8:274,304,199,32,308,1046,251
vb1_example	550	.	G	A	164.139	.	AB=0.0958904;ABP=210.103;AC=1;AF=0.2;AN=5;AO=14;CIGAR=1X;DP=146;DPB=146;DPRA=0;EPP=3.63072;EPPR=9.59052;GTI=0;LEN=1;MEANALT=1;MQM=49.6429;MQMR=55.7576;NS=1;NUMALT=1;ODDS=37.7944;PAIRED=0;PAIREDR=0;PAO=0;PQA=0;PQR=0;PRO=0;QA=528;QR=4750;RO=132;RPL=9;RPP=5.49198;RPPR=6.23461;RPR=5;RUN=1;SAF=5;SAP=5.49198;SAR=9;SRF=47;SRP=26.7649;SRR=85;TYPE=snp	GT:DP:RO:QR:AO:QA	0/0/0/0/1:146:132:4750:14:528
vb1_example	556	.	CGGCAGAG	TGGCAGAT,CAGCAGAG,CTGCAGAG,TGGCAGAG,CGGCAGAT	726.711	.	AB=0.1,0.1,0.0428571,0.221429,0.0857143;ABP=197.574,197.574,257.135,97.3763,211.72;AC=0,1,0,1,1;AF=0,0.2,0,0.2,0.2;AN=5;AO=14,14,6,31,12;CIGAR=1X6M1X,1M1X6M,1M1X6M,1X7M,7M1X;DP=140;DPB=155.375;DPRA=0,0,0,0,0;EPP=5.49198,5.49198,16.0391,3.08035,5.9056;EPPR=3.872;GTI=1;LEN=8,1,1,1,1;MEANALT=5,5,5,5,5;MQM=55.7143,57.3571,60,53.4839,59.8333;MQMR=57.0635;NS=1;NUMALT=5;ODDS=14.2758;PAIRED=0,0,0,0,0;PAI…	GT:DP:RO:QR:AO:QA	0/0/2/4/5:140:63:2263:14,14,6,31,12:455,517,228,1123,436
vb1_example	570	.	GAGTAAGA	CAGTAA	122.996	.	AB=0.0952381;ABP=212.195;AC=1;AF=0.2;AN=5;AO=14;CIGAR=1X4M2D1M;DP=147;DPB=152.125;DPRA=0;EPP=3.63072;EPPR=18.94;GTI=0;LEN=6;MEANALT=3;MQM=57.3571;MQMR=58.9847;NS=1;NUMALT=1;ODDS=28.3208;PAIRED=0;PAIREDR=0;PAO=0;PQA=0;PQR=710;PRO=20;QA=497;QR=4679;RO=131;RPL=5;RPP=5.49198;RPPR=3.02688;RPR=9;RUN=1;SAF=3;SAP=12.937;SAR=11;SRF=60;SRP=5.01601;SRR=71;TYPE=complex	GT:DP:RO:QR:AO:QA	0/0/0/0/1:147:131:4679:14:497
vb1_example	590	.	T	A	1.93439	.	AB=0.05625;ABP=276.67;AC=1;AF=0.2;AN=5;AO=9;CIGAR=1X;DP=160;DPB=160;DPRA=0;EPP=9.04217;EPPR=13.4938;GTI=0;LEN=1;MEANALT=1;MQM=58.4444;MQMR=59.755;NS=1;NUMALT=1;ODDS=0.577801;PAIRED=0;PAIREDR=0;PAO=0;PQA=0;PQR=0;PRO=0;QA=343;QR=5465;RO=151;RPL=6;RPP=5.18177;RPPR=10.6176;RPR=3;RUN=1;SAF=3;SAP=5.18177;SAR=6;SRF=61;SRP=15.1044;SRR=90;TYPE=snp	GT:DP:RO:QR:AO:QA	0/0/0/0/1:160:151:5465:9:343
vb1_example	600	.	T	C	285.145	.	AB=0.119205;ABP=193.194;AC=1;AF=0.2;AN=5;AO=18;CIGAR=1X;DP=151;DPB=151;DPRA=0;EPP=7.35324;EPPR=4.98585;GTI=0;LEN=1;MEANALT=1;MQM=60;MQMR=60;NS=1;NUMALT=1;ODDS=51.9756;PAIRED=0;PAIREDR=0;PAO=0;PQA=0;PQR=0;PRO=0;QA=669;QR=4993;RO=133;RPL=7;RPP=4.9405;RPPR=13.2146;RPR=11;RUN=1;SAF=11;SAP=4.9405;SAR=7;SRF=56;SRP=10.2104;SRR=77;TYPE=snp	GT:DP:RO:QR:AO:QA	0/0/0/0/1:151:133:4993:18:669
vb1_example	604	.	T	C	462.709	.	AB=0.156863;ABP=159.484;AC=1;AF=0.2;AN=5;AO=24;CIGAR=1X;DP=153;DPB=153;DPRA=0;EPP=6.26751;EPPR=6.79775;GTI=0;LEN=1;MEANALT=1;MQM=60;MQMR=60;NS=1;NUMALT=1;ODDS=41.3564;PAIRED=0;PAIREDR=0;PAO=0;PQA=0;PQR=0;PRO=0;QA=899;QR=4853;RO=129;RPL=9;RPP=6.26751;RPPR=7.87507;RPR=15;RUN=1;SAF=10;SAP=4.45795;SAR=14;SRF=59;SRP=5.04711;SRR=70;TYPE=snp	GT:DP:RO:QR:AO:QA	0/0/0/0/1:153:129:4853:24:899
vb1_example	621	.	G	A	139.348	.	AB=0.0786517;ABP=277.494;AC=1;AF=0.2;AN=5;AO=14;CIGAR=1X;DP=178;DPB=178;DPRA=0;EPP=5.49198;EPPR=18.3165;GTI=0;LEN=1;MEANALT=1;MQM=60;MQMR=59.9512;NS=1;NUMALT=1;ODDS=32.086;PAIRED=0;PAIREDR=0;PAO=0;PQA=0;PQR=0;PRO=0;QA=536;QR=6128;RO=164;RPL=6;RPP=3.63072;RPPR=6.39992;RPR=8;RUN=1;SAF=5;SAP=5.49198;SAR=9;SRF=71;SRP=9.41879;SRR=93;TYPE=snp	GT:DP:RO:QR:AO:QA	0/0/0/0/1:178:164:6128:14:536
vb1_example	636	.	AGAGCATTGCCAACAGCTGAACACATA	GGAGCATTGCCAACAACTGAACACATT,GGAGCATTGCCAACAACTGAACACATA,GGAGCATTACCAACAGCTGAACACATA,GGAGCATTACCAACAACTGAACACATT	3212.33	.	AB=0.404762,0.230159,0.0238095,0.309524;ABP=12.937,82.6999,251.179,42.7172;AC=3,1,0,1;AF=0.6,0.2,0,0.2;AN=5;AO=51,29,3,39;CIGAR=1X14M1X10M1X,1X14M1X11M,1X7M1X18M,1X7M1X6M1X10M1X;DP=126;DPB=187.111;DPRA=0,0,0,0;EPP=3.05288,3.08518,3.73412,7.52028;EPPR=0;GTI=0;LEN=27,27,27,27;MEANALT=8,8,8,8;MQM=60,60,60,59.7949;MQMR=0;NS=1;NUMALT=4;ODDS=31.8431;PAIRED=0,0,0,0;PAIREDR=0;PAO=38.5,26.8333,9.33333,38;…	GT:DP:RO:QR:AO:QA	1/1/1/2/4:126:0:0:51,29,3,39:1838,1113,108,1417
vb1_example	686	.	G	C	858.867	.	AB=0.211055;ABP=147.32;AC=1;AF=0.2;AN=5;AO=42;CIGAR=1X;DP=199;DPB=199;DPRA=0;EPP=6.31921;EPPR=5.01474;GTI=0;LEN=1;MEANALT=2;MQM=60;MQMR=60;NS=1;NUMALT=1;ODDS=31.9379;PAIRED=0;PAIREDR=0;PAO=0;PQA=0;PQR=0;PRO=0;QA=1538;QR=5821;RO=156;RPL=11;RPP=23.691;RPPR=3.23302;RPR=31;RUN=1;SAF=16;SAP=8.18047;SAR=26;SRF=56;SRP=29.9588;SRR=100;TYPE=snp	GT:DP:RO:QR:AO:QA	0/0/0/0/1:199:156:5821:42:1538
vb1_example	725	.	GAAGGCCG	CAAGGCCA,CAAGGCCG	2298.59	.	AB=0.0434783,0.546584;ABP=294.46,6.04497;AC=0,3;AF=0,0.6;AN=5;AO=7,88;CIGAR=1X6M1X,1X7M;DP=161;DPB=172.75;DPRA=0,0;EPP=5.80219,28.2783;EPPR=4.19474;GTI=0;LEN=8,1;MEANALT=2,2;MQM=60,60;MQMR=60;NS=1;NUMALT=2;ODDS=23.1115;PAIRED=0,0;PAIREDR=0;PAO=6,6.5;PQA=210,231.5;PQR=284.5;PRO=8.5;QA=246,3286;QR=2396;RO=66;RPL=5,56;RPP=5.80219,17.2236;RPPR=13.6703;RPR=2,32;RUN=1,1;SAF=4,34;SAP=3.32051,12.8806;SAR…	GT:DP:RO:QR:AO:QA	0/0/2/2/2:161:66:2396:7,88:246,3286
vb1_example	764	.	T	G	4728.21	.	AB=0.808824;ABP=172.002;AC=4;AF=0.8;AN=5;AO=165;CIGAR=1X;DP=204;DPB=204;DPRA=0;EPP=5.23441;EPPR=4.40227;GTI=0;LEN=1;MEANALT=1;MQM=60;MQMR=60;NS=1;NUMALT=1;ODDS=41.2751;PAIRED=0;PAIREDR=0;PAO=0;PQA=0;PQR=0;PRO=0;QA=5816;QR=1377;RO=39;RPL=67;RPP=15.6575;RPPR=15.538;RPR=98;RUN=1;SAF=80;SAP=3.33931;SAR=85;SRF=22;SRP=4.40227;SRR=17;TYPE=snp	GT:DP:RO:QR:AO:QA	0/1/1/1/1:204:39:1377:165:5816
vb1_example	781	.	A	G	62.7644	.	AB=0.0656566;ABP=327.459;AC=1;AF=0.2;AN=5;AO=13;CIGAR=1X;DP=198;DPB=198;DPRA=0;EPP=4.51363;EPPR=3.11594;GTI=0;LEN=1;MEANALT=1;MQM=60;MQMR=60;NS=1;NUMALT=1;ODDS=14.452;PAIRED=0;PAIREDR=0;PAO=0;PQA=0;PQR=0;PRO=0;QA=494;QR=6834;RO=185;RPL=10;RPP=11.1951;RPPR=6.40249;RPR=3;RUN=1;SAF=4;SAP=7.18621;SAR=9;SRF=103;SRP=8.18662;SRR=82;TYPE=snp	GT:DP:RO:QR:AO:QA	0/0/0/0/1:198:185:6834:13:494
vb1_example	782	.	T	C	194.512	.	AB=0.0858586;ABP=297.98;AC=1;AF=0.2;AN=5;AO=17;CIGAR=1X;DP=198;DPB=198;DPRA=0;EPP=9.26925;EPPR=3.0103;GTI=0;LEN=1;MEANALT=2;MQM=60;MQMR=60;NS=1;NUMALT=1;ODDS=44.7882;PAIRED=0;PAIREDR=0;PAO=0;PQA=0;PQR=0;PRO=0;QA=644;QR=6601;RO=180;RPL=7;RPP=4.1599;RPPR=26.3657;RPR=10;RUN=1;SAF=11;SAP=6.20364;SAR=6;SRF=96;SRP=4.74748;SRR=84;TYPE=snp	GT:DP:RO:QR:AO:QA	0/0/0/0/1:198:180:6601:17:644

## Sheet: dna_haplotypes_10bp_windw_line7
##fileformat=VCFv4.1
##fileDate=20181009
##source=freeBayes v1.0.2
##reference=tcr_vb1_example.fa
##phasing=none
##commandline="freebayes -f tcr_vb1_example.fa -p 5 -F 0.01 -C 2 --pooled-continuous --haplotype-length 10 realigned_sorted_igv_7_vb1.bam"
##INFO=<ID=NS,Number=1,Type=Integer,Description="Number of samples with data">
##INFO=<ID=DP,Number=1,Type=Integer,Description="Total read depth at the locus">
##INFO=<ID=DPB,Number=1,Type=Float,Description="Total read depth per bp at the locus; bases in reads overlapping / bases in haplotype">
##INFO=<ID=AC,Number=A,Type=Integer,Description="Total number of alternate alleles in called genotypes">
##INFO=<ID=AN,Number=1,Type=Integer,Description="Total number of alleles in called genotypes">
##INFO=<ID=AF,Number=A,Type=Float,Description="Estimated allele frequency in the range (0,1]">
##INFO=<ID=RO,Number=1,Type=Integer,Description="Reference allele observation count, with partial observations recorded fractionally">
##INFO=<ID=AO,Number=A,Type=Integer,Description="Alternate allele observations, with partial observations recorded fractionally">
##INFO=<ID=PRO,Number=1,Type=Float,Description="Reference allele observation count, with partial observations recorded fractionally">
##INFO=<ID=PAO,Number=A,Type=Float,Description="Alternate allele observations, with partial observations recorded fractionally">
##INFO=<ID=QR,Number=1,Type=Integer,Description="Reference allele quality sum in phred">
##INFO=<ID=QA,Number=A,Type=Integer,Description="Alternate allele quality sum in phred">
##INFO=<ID=PQR,Number=1,Type=Float,Description="Reference allele quality sum in phred for partial observations">
##INFO=<ID=PQA,Number=A,Type=Float,Description="Alternate allele quality sum in phred for partial observations">
##INFO=<ID=SRF,Number=1,Type=Integer,Description="Number of reference observations on the forward strand">
##INFO=<ID=SRR,Number=1,Type=Integer,Description="Number of reference observations on the reverse strand">
##INFO=<ID=SAF,Number=A,Type=Integer,Description="Number of alternate observations on the forward strand">
##INFO=<ID=SAR,Number=A,Type=Integer,Description="Number of alternate observations on the reverse strand">
##INFO=<ID=SRP,Number=1,Type=Float,Description="Strand balance probability for the reference allele: Phred-scaled upper-bounds estimate of the probability of observing the deviation between SRF and SRR given E(SRF/SRR) ~ 0.5, derived using Hoeffding's inequality">
##INFO=<ID=SAP,Number=A,Type=Float,Description="Strand balance probability for the alternate allele: Phred-scaled upper-bounds estimate of the probability of observing the deviation between SAF and SAR given E(SAF/SAR) ~ 0.5, derived using Hoeffding's inequality">
##INFO=<ID=AB,Number=A,Type=Float,Description="Allele balance at heterozygous sites: a number between 0 and 1 representing the ratio of reads showing the reference allele to all reads, considering only reads from individuals called as heterozygous">
##INFO=<ID=ABP,Number=A,Type=Float,Description="Allele balance probability at heterozygous sites: Phred-scaled upper-bounds estimate of the probability of observing the deviation between ABR and ABA given E(ABR/ABA) ~ 0.5, derived using Hoeffding's inequality">
##INFO=<ID=RUN,Number=A,Type=Integer,Description="Run length: the number of consecutive repeats of the alternate allele in the reference genome">
##INFO=<ID=RPP,Number=A,Type=Float,Description="Read Placement Probability: Phred-scaled upper-bounds estimate of the probability of observing the deviation between RPL and RPR given E(RPL/RPR) ~ 0.5, derived using Hoeffding's inequality">
##INFO=<ID=RPPR,Number=1,Type=Float,Description="Read Placement Probability for reference observations: Phred-scaled upper-bounds estimate of the probability of observing the deviation between RPL and RPR given E(RPL/RPR) ~ 0.5, derived using Hoeffding's inequality">
##INFO=<ID=RPL,Number=A,Type=Float,Description="Reads Placed Left: number of reads supporting the alternate balanced to the left (5') of the alternate allele">
##INFO=<ID=RPR,Number=A,Type=Float,Description="Reads Placed Right: number of reads supporting the alternate balanced to the right (3') of the alternate allele">
##INFO=<ID=EPP,Number=A,Type=Float,Description="End Placement Probability: Phred-scaled upper-bounds estimate of the probability of observing the deviation between EL and ER given E(EL/ER) ~ 0.5, derived using Hoeffding's inequality">
##INFO=<ID=EPPR,Number=1,Type=Float,Description="End Placement Probability for reference observations: Phred-scaled upper-bounds estimate of the probability of observing the deviation between EL and ER given E(EL/ER) ~ 0.5, derived using Hoeffding's inequality">
##INFO=<ID=DPRA,Number=A,Type=Float,Description="Alternate allele depth ratio. Ratio between depth in samples with each called alternate allele and those without.">
##INFO=<ID=ODDS,Number=1,Type=Float,Description="The log odds ratio of the best genotype combination to the second-best.">
##INFO=<ID=GTI,Number=1,Type=Integer,Description="Number of genotyping iterations required to reach convergence or bailout.">
##INFO=<ID=TYPE,Number=A,Type=String,Description="The type of allele, either snp, mnp, ins, del, or complex.">
##INFO=<ID=CIGAR,Number=A,Type=String,Description="The extended CIGAR representation of each alternate allele, with the exception that '=' is replaced by 'M' to ease VCF parsing. Note that INDEL alleles do not have the first matched base (which is provided by default, per the spec) referred to by the CIGAR.">
##INFO=<ID=NUMALT,Number=1,Type=Integer,Description="Number of unique non-reference alleles in called genotypes at this position.">
##INFO=<ID=MEANALT,Number=A,Type=Float,Description="Mean number of unique non-reference allele observations per sample with the corresponding alternate alleles.">
##INFO=<ID=LEN,Number=A,Type=Integer,Description="allele length">
##INFO=<ID=MQM,Number=A,Type=Float,Description="Mean mapping quality of observed alternate alleles">
##INFO=<ID=MQMR,Number=1,Type=Float,Description="Mean mapping quality of observed reference alleles">
##INFO=<ID=PAIRED,Number=A,Type=Float,Description="Proportion of observed alternate alleles which are supported by properly paired read fragments">
##INFO=<ID=PAIREDR,Number=1,Type=Float,Description="Proportion of observed reference alleles which are supported by properly paired read fragments">
##INFO=<ID=MIN,Number=1,Type=Integer,Description="Minimum depth in gVCF output block.">
##INFO=<ID=END,Number=1,Type=Integer,Description="Last position (inclusive) in gVCF output record.">
##FORMAT=<ID=GT,Number=1,Type=String,Description="Genotype">
##FORMAT=<ID=GQ,Number=1,Type=Float,Description="Genotype Quality, the Phred-scaled marginal (or unconditional) probability of the called genotype">
##FORMAT=<ID=GL,Number=G,Type=Float,Description="Genotype Likelihood, log10-scaled likelihoods of the data given the called genotype for each possible genotype generated from the reference and alternate alleles given the sample ploidy">
##FORMAT=<ID=DP,Number=1,Type=Integer,Description="Read Depth">
##FORMAT=<ID=RO,Number=1,Type=Integer,Description="Reference allele observation count">
##FORMAT=<ID=QR,Number=1,Type=Integer,Description="Sum of quality of the reference observations">
##FORMAT=<ID=AO,Number=A,Type=Integer,Description="Alternate allele observation count">
##FORMAT=<ID=QA,Number=A,Type=Integer,Description="Sum of quality of the alternate observations">
##FORMAT=<ID=MIN,Number=1,Type=Integer,Description="Minimum depth in gVCF output block.">
#CHROM	POS	ID	REF	ALT	QUAL	FILTER	INFO	FORMAT	unknown
vb1_example	15	.	G	A	195.431	.	AB=0.171429;ABP=68.6508;AC=1;AF=0.2;AN=5;AO=12;CIGAR=1X;DP=70;DPB=70;DPRA=0;EPP=3.73412;EPPR=3.60933;GTI=0;LEN=1;MEANALT=1;MQM=60;MQMR=60;NS=1;NUMALT=1;ODDS=17.1411;PAIRED=0;PAIREDR=0;PAO=0;PQA=0;PQR=0;PRO=0;QA=457;QR=2170;RO=58;RPL=0;RPP=29.068;RPPR=128.956;RPR=12;RUN=1;SAF=7;SAP=3.73412;SAR=5;SRF=27;SRP=3.60933;SRR=31;TYPE=snp	GT:DP:RO:QR:AO:QA	0/0/0/0/1:70:58:2170:12:457
vb1_example	33	.	GTCATTGAGT	ATCATTGAGG,GTCATTGAGG	119.112	.	AB=0.141026,0.0512821;ABP=90.3146,139.423;AC=1,1;AF=0.2,0.2;AN=5;AO=11,4;CIGAR=1X8M1X,9M1X;DP=78;DPB=84.4;DPRA=0,0;EPP=3.20771,3.0103;EPPR=9.87495;GTI=1;LEN=10,1;MEANALT=3,3;MQM=60,60;MQMR=60;NS=1;NUMALT=2;ODDS=10.5586;PAIRED=0,0;PAIREDR=0;PAO=1,4;PQA=36,120.5;PQR=328.5;PRO=10;QA=396,156;QR=2275;RO=62;RPL=7,2;RPP=4.78696,3.0103;RPPR=8.05372;RPR=4,2;RUN=1,1;SAF=4,2;SAP=4.78696,3.0103;SAR=7,2;SRF=3…	GT:DP:RO:QR:AO:QA	0/0/0/1/2:78:62:2275:11,4:396,156
vb1_example	58	.	ACCACTGATAAGGATTTCT	GCCATTGATAAGGAGTTCC,GCCACTGATAAGGATTTCT	1699.08	.	AB=0.356164,0.383562;ABP=16.1284,11.607;AC=1,3;AF=0.2,0.6;AN=5;AO=26,28;CIGAR=1X3M1X9M1X3M1X,1X18M;DP=73;DPB=95.7895;DPRA=0,0;EPP=6.01695,5.80219;EPPR=3.13803;GTI=1;LEN=19,1;MEANALT=4,4;MQM=60,60;MQMR=60;NS=1;NUMALT=2;ODDS=1.78758;PAIRED=0,0;PAIREDR=0;PAO=14.5,18.5;PQA=494,616.5;PQR=381.5;PRO=12;QA=927,1029;QR=620;RO=17;RPL=7,17;RPP=15.0369,5.80219;RPPR=6.20364;RPR=19,11;RUN=1,1;SAF=11,12;SAP=4.3…	GT:DP:RO:QR:AO:QA	0/1/2/2/2:73:17:620:26,28:927,1029
vb1_example	93	.	TTGGAAGC	CTGGAAGT	162.078	.	AB=0.113402;ABP=128.933;AC=1;AF=0.2;AN=5;AO=11;CIGAR=1X6M1X;DP=97;DPB=106.375;DPRA=0;EPP=7.94546;EPPR=8.75832;GTI=0;LEN=8;MEANALT=2;MQM=60;MQMR=60;NS=1;NUMALT=1;ODDS=36.4158;PAIRED=0;PAIREDR=0;PAO=2;PQA=72;PQR=442;PRO=13;QA=382;QR=3156;RO=85;RPL=5;RPP=3.20771;RPPR=3.03585;RPR=6;RUN=1;SAF=5;SAP=3.20771;SAR=6;SRF=37;SRP=6.10145;SRR=48;TYPE=complex	GT:DP:RO:QR:AO:QA	0/0/0/0/1:97:85:3156:11:382
vb1_example	133	.	C	T	1709.38	.	AB=0.547009;ABP=5.25601;AC=3;AF=0.6;AN=5;AO=64;CIGAR=1X;DP=117;DPB=117;DPRA=0;EPP=7.89611;EPPR=7.18621;GTI=0;LEN=1;MEANALT=2;MQM=60;MQMR=60;NS=1;NUMALT=1;ODDS=9.73116;PAIRED=0;PAIREDR=0;PAO=0;PQA=0;PQR=0;PRO=0;QA=2366;QR=1840;RO=52;RPL=35;RPP=4.23175;RPPR=3.0103;RPR=29;RUN=1;SAF=29;SAP=4.23175;SAR=35;SRF=25;SRP=3.17734;SRR=27;TYPE=snp	GT:DP:RO:QR:AO:QA	0/0/1/1/1:117:52:1840:64:2366
vb1_example	143	.	C	A	1.44117e-06	.	AB=0.045045;ABP=202.571;AC=1;AF=0.2;AN=5;AO=5;CIGAR=1X;DP=111;DPB=111;DPRA=0;EPP=3.44459;EPPR=4.32138;GTI=0;LEN=1;MEANALT=1;MQM=60;MQMR=60;NS=1;NUMALT=1;ODDS=14.9186;PAIRED=0;PAIREDR=0;PAO=0;PQA=0;PQR=0;PRO=0;QA=178;QR=3925;RO=106;RPL=2;RPP=3.44459;RPPR=3.74778;RPR=3;RUN=1;SAF=2;SAP=3.44459;SAR=3;SRF=53;SRP=3.0103;SRR=53;TYPE=snp	GT:DP:RO:QR:AO:QA	0/0/0/0/1:111:106:3925:5:178
vb1_example	150	.	A	G	1.00772e-13	.	AB=0;ABP=0;AC=0;AF=0;AN=5;AO=3;CIGAR=1X;DP=114;DPB=114;DPRA=0;EPP=9.52472;EPPR=6.31642;GTI=0;LEN=1;MEANALT=1;MQM=60;MQMR=60;NS=1;NUMALT=1;ODDS=31.8769;PAIRED=0;PAIREDR=0;PAO=0;PQA=0;PQR=0;PRO=0;QA=119;QR=3954;RO=111;RPL=3;RPP=9.52472;RPPR=4.59489;RPR=0;RUN=1;SAF=0;SAP=9.52472;SAR=3;SRF=56;SRP=3.02986;SRR=55;TYPE=snp	GT:DP:RO:QR:AO:QA	0/0/0/0/0:114:111:3954:3:119
vb1_example	169	.	G	C	512.233	.	AB=0.242991;ABP=64.4001;AC=1;AF=0.2;AN=5;AO=26;CIGAR=1X;DP=107;DPB=107;DPRA=0;EPP=11.3621;EPPR=5.18177;GTI=0;LEN=1;MEANALT=1;MQM=60;MQMR=60;NS=1;NUMALT=1;ODDS=10.9663;PAIRED=0;PAIREDR=0;PAO=0;PQA=0;PQR=0;PRO=0;QA=945;QR=2920;RO=81;RPL=8;RPP=11.3621;RPPR=3.68051;RPR=18;RUN=1;SAF=8;SAP=11.3621;SAR=18;SRF=42;SRP=3.25157;SRR=39;TYPE=snp	GT:DP:RO:QR:AO:QA	0/0/0/0/1:107:81:2920:26:945
vb1_example	200	.	ACATGGTCCGGATTA	GCATGTTCCAGGCTC,ACATGGTCCAGAATC,ACATGGTCTGGATTA	2259.27	.	AB=0.091954,0.137931,0.643678;ABP=128.831,102.074,18.61;AC=1,1,2;AF=0.2,0.2,0.4;AN=5;AO=8,12,56;CIGAR=1X4M1X3M1X1M2X1M1X,9M1X2M1X1M1X,8M1X6M;DP=87;DPB=111.467;DPRA=0,0,0;EPP=3.0103,5.9056,4.40625;EPPR=3.0103;GTI=1;LEN=15,15,1;MEANALT=4,4,4;MQM=60,60,60;MQMR=60;NS=1;NUMALT=3;ODDS=8.55593;PAIRED=0,0,0;PAIREDR=0;PAO=1,9.16667,21.1667;PQA=32,325.667,761.667;PQR=385.667;PRO=10.6667;QA=296,417,2048;QR=…	GT:DP:RO:QR:AO:QA	0/1/2/3/3:87:10:353:8,12,56:296,417,2048
vb1_example	227	.	CTGAA	GTGAG,GTGAA	1482.16	.	AB=0.213592,0.398058;ABP=76.3976,12.3076;AC=1,2;AF=0.2,0.4;AN=5;AO=22,41;CIGAR=1X3M1X,1X4M;DP=103;DPB=104;DPRA=0,0;EPP=3.0103,7.30028;EPPR=3.22745;GTI=0;LEN=5,1;MEANALT=2,2;MQM=60,60;MQMR=60;NS=1;NUMALT=2;ODDS=22.8968;PAIRED=0,0;PAIREDR=0;PAO=0,0;PQA=0,0;PQR=94;PRO=3;QA=782,1521;QR=1456;RO=40;RPL=9,21;RPP=4.58955,3.06326;RPPR=3.0103;RPR=13,20;RUN=1,1;SAF=12,25;SAP=3.40511,7.30028;SAR=10,16;SRF=19…	GT:DP:RO:QR:AO:QA	0/0/1/2/2:103:40:1456:22,41:782,1521
vb1_example	258	.	T	C	0.00751014	.	AB=0.0549451;ABP=159.571;AC=1;AF=0.2;AN=5;AO=5;CIGAR=1X;DP=91;DPB=91;DPRA=0;EPP=3.44459;EPPR=3.91929;GTI=0;LEN=1;MEANALT=1;MQM=60;MQMR=60;NS=1;NUMALT=1;ODDS=6.35919;PAIRED=0;PAIREDR=0;PAO=0;PQA=0;PQR=0;PRO=0;QA=192;QR=3010;RO=86;RPL=3;RPP=3.44459;RPPR=22.806;RPR=2;RUN=1;SAF=0;SAP=13.8677;SAR=5;SRF=49;SRP=6.64625;SRR=37;TYPE=snp	GT:DP:RO:QR:AO:QA	0/0/0/0/1:91:86:3010:5:192
vb1_example	305	.	G	C	559.044	.	AB=0.40625;ABP=7.89611;AC=2;AF=0.4;AN=5;AO=26;CIGAR=1X;DP=64;DPB=64;DPRA=0;EPP=8.35546;EPPR=3.9246;GTI=0;LEN=1;MEANALT=1;MQM=60;MQMR=60;NS=1;NUMALT=1;ODDS=9.73116;PAIRED=0;PAIREDR=0;PAO=0;PQA=0;PQR=0;PRO=0;QA=894;QR=1402;RO=38;RPL=12;RPP=3.34437;RPPR=3.0103;RPR=14;RUN=1;SAF=13;SAP=3.0103;SAR=13;SRF=16;SRP=5.06748;SRR=22;TYPE=snp	GT:DP:RO:QR:AO:QA	0/0/0/1/1:64:38:1402:26:894
vb1_example	320	.	A	G	696.945	.	AB=0.402778;ABP=8.92153;AC=2;AF=0.4;AN=5;AO=29;CIGAR=1X;DP=72;DPB=72;DPRA=0;EPP=3.08518;EPPR=3.46479;GTI=0;LEN=1;MEANALT=1;MQM=60;MQMR=60;NS=1;NUMALT=1;ODDS=11.353;PAIRED=0;PAIREDR=0;PAO=0;PQA=0;PQR=0;PRO=0;QA=1093;QR=1555;RO=43;RPL=16;RPP=3.68421;RPPR=7.10075;RPR=13;RUN=1;SAF=6;SAP=24.6501;SAR=23;SRF=28;SRP=11.5447;SRR=15;TYPE=snp	GT:DP:RO:QR:AO:QA	0/0/0/1/1:72:43:1555:29:1093
vb1_example	322	.	T	G	175.276	.	AB=0.162162;ABP=76.3709;AC=1;AF=0.2;AN=5;AO=12;CIGAR=1X;DP=74;DPB=74;DPRA=0;EPP=14.5915;EPPR=3.57068;GTI=0;LEN=1;MEANALT=1;MQM=60;MQMR=60;NS=1;NUMALT=1;ODDS=19.4425;PAIRED=0;PAIREDR=0;PAO=0;PQA=0;PQR=0;PRO=0;QA=446;QR=2283;RO=62;RPL=3;RPP=9.52472;RPPR=3.15039;RPR=9;RUN=1;SAF=11;SAP=21.1059;SAR=1;SRF=25;SRP=8.05372;SRR=37;TYPE=snp	GT:DP:RO:QR:AO:QA	0/0/0/0/1:74:62:2283:12:446
vb1_example	325	.	G	A	632.927	.	AB=0.36;ABP=15.7786;AC=2;AF=0.4;AN=5;AO=27;CIGAR=1X;DP=75;DPB=75;DPRA=0;EPP=3.09072;EPPR=4.6389;GTI=0;LEN=1;MEANALT=1;MQM=60;MQMR=60;NS=1;NUMALT=1;ODDS=9.407;PAIRED=0;PAIREDR=0;PAO=0;PQA=0;PQR=0;PRO=0;QA=1005;QR=1789;RO=48;RPL=10;RPP=6.95112;RPPR=4.6389;RPR=17;RUN=1;SAF=14;SAP=3.09072;SAR=13;SRF=24;SRP=3.0103;SRR=24;TYPE=snp	GT:DP:RO:QR:AO:QA	0/0/0/1/1:75:48:1789:27:1005
vb1_example	335	.	A	C	0.00136415	.	AB=0.0493827;ABP=145.872;AC=1;AF=0.2;AN=5;AO=4;CIGAR=1X;DP=81;DPB=81;DPRA=0;EPP=5.18177;EPPR=11.1604;GTI=0;LEN=1;MEANALT=1;MQM=60;MQMR=60;NS=1;NUMALT=1;ODDS=8.06562;PAIRED=0;PAIREDR=0;PAO=0;PQA=0;PQR=0;PRO=0;QA=155;QR=2844;RO=77;RPL=3;RPP=5.18177;RPPR=15.4469;RPR=1;RUN=1;SAF=2;SAP=3.0103;SAR=2;SRF=39;SRP=3.0385;SRR=38;TYPE=snp	GT:DP:RO:QR:AO:QA	0/0/0/0/1:81:77:2844:4:155
vb1_example	338	.	A	G	36.0028	.	AB=0.0813953;ABP=133.905;AC=1;AF=0.2;AN=5;AO=7;CIGAR=1X;DP=86;DPB=86;DPRA=0;EPP=10.7656;EPPR=17.5509;GTI=0;LEN=1;MEANALT=1;MQM=60;MQMR=60;NS=1;NUMALT=1;ODDS=8.2897;PAIRED=0;PAIREDR=0;PAO=0;PQA=0;PQR=0;PRO=0;QA=257;QR=2868;RO=79;RPL=2;RPP=5.80219;RPPR=12.9331;RPR=5;RUN=1;SAF=3;SAP=3.32051;SAR=4;SRF=41;SRP=3.25768;SRR=38;TYPE=snp	GT:DP:RO:QR:AO:QA	0/0/0/0/1:86:79:2868:7:257
vb1_example	349	.	A	G	331.051	.	AB=0.189474;ABP=82.5776;AC=1;AF=0.2;AN=5;AO=18;CIGAR=1X;DP=95;DPB=95;DPRA=0;EPP=10.7311;EPPR=15.4469;GTI=0;LEN=1;MEANALT=1;MQM=60;MQMR=60;NS=1;NUMALT=1;ODDS=19.7552;PAIRED=0;PAIREDR=0;PAO=0;PQA=0;PQR=0;PRO=0;QA=685;QR=2798;RO=77;RPL=4;RPP=15.074;RPPR=7.77626;RPR=14;RUN=1;SAF=15;SAP=20.3821;SAR=3;SRF=37;SRP=3.26411;SRR=40;TYPE=snp	GT:DP:RO:QR:AO:QA	0/0/0/0/1:95:77:2798:18:685
vb1_example	375	.	A	C	509.036	.	AB=0.25;ABP=57.2971;AC=1;AF=0.2;AN=5;AO=25;CIGAR=1X;DP=100;DPB=100;DPRA=0;EPP=3.09716;EPPR=4.429;GTI=0;LEN=1;MEANALT=1;MQM=60;MQMR=60;NS=1;NUMALT=1;ODDS=8.90042;PAIRED=0;PAIREDR=0;PAO=0;PQA=0;PQR=0;PRO=0;QA=940;QR=2743;RO=75;RPL=10;RPP=5.18177;RPPR=3.03925;RPR=15;RUN=1;SAF=22;SAP=34.3664;SAR=3;SRF=38;SRP=3.03925;SRR=37;TYPE=snp	GT:DP:RO:QR:AO:QA	0/0/0/0/1:100:75:2743:25:940
vb1_example	390	.	ATGTCGG	GTGTCTT,GTGTCGG,ATGTTGG,ATGTCAG	1498.38	.	AB=0.118182,0.0909091,0.0636364,0.418182;ABP=142.3,162.91,184.94,9.40627;AC=1,1,0,2;AF=0.2,0.2,0,0.4;AN=5;AO=13,10,7,46;CIGAR=1X4M2X,1X6M,4M1X2M,5M1X1M;DP=110;DPB=116.143;DPRA=0,0,0,0;EPP=4.51363,6.48466,3.32051,12.2627;EPPR=3.0103;GTI=0;LEN=7,1,1,1;MEANALT=4,4,4,4;MQM=60,60,60,60;MQMR=60;NS=1;NUMALT=4;ODDS=15.2492;PAIRED=0,0,0,0;PAIREDR=0;PAO=1.5,3.58333,1.41667,6.08333;PQA=54.5,98.1667,23.6667,…	GT:DP:RO:QR:AO:QA	0/1/2/4/4:110:34:1250:13,10,7,46:405,368,256,1707
vb1_example	414	.	TGGAG	AGGAA,TGGAA	1629.1	.	AB=0.147826,0.443478;ABP=126.898,6.20142;AC=1,2;AF=0.2,0.4;AN=5;AO=17,51;CIGAR=1X3M1X,4M1X;DP=115;DPB=121.4;DPRA=0,0;EPP=3.13803,10.206;EPPR=15.095;GTI=0;LEN=5,1;MEANALT=3,3;MQM=60,59.7843;MQMR=60;NS=1;NUMALT=2;ODDS=15.637;PAIRED=0,0;PAIREDR=0;PAO=6.5,4;PQA=231.5,138.5;PQR=46;PRO=1.5;QA=603,1855;QR=1655;RO=46;RPL=8,21;RPP=3.13803,6.45911;RPPR=3.19912;RPR=9,30;RUN=1,1;SAF=8,24;SAP=3.13803,3.3935;S…	GT:DP:RO:QR:AO:QA	0/0/1/2/2:115:46:1655:17,51:603,1855
vb1_example	461	.	GTAGTATTTTTTTCTTA	CTAGTAATTTTTTCTTTCTTA	900.859	.	AB=0.318681;ABP=28.9964;AC=2;AF=0.4;AN=5;AO=29;CIGAR=1X5M4I3M1X7M;DP=91;DPB=125.529;DPRA=0;EPP=9.07545;EPPR=9.44853;GTI=0;LEN=21;MEANALT=5;MQM=44.9655;MQMR=60;NS=1;NUMALT=1;ODDS=9.63111;PAIRED=0;PAIREDR=0;PAO=16;PQA=604.5;PQR=854.5;PRO=24;QA=941;QR=2115;RO=57;RPL=13;RPP=3.68421;RPPR=3.35316;RPR=16;RUN=1;SAF=16;SAP=3.68421;SAR=13;SRF=34;SRP=7.61992;SRR=23;TYPE=complex	GT:DP:RO:QR:AO:QA	0/0/0/1/1:91:57:2115:29:941
vb1_example	478	.	CATA	CGTG,CATGTA,CATG	1228.3	.	AB=0.340206,0.28866,0.0206186;ABP=24.5235,40.6417,196.63;AC=2,1,0;AF=0.4,0.2,0;AN=5;AO=33,28,2;CIGAR=1M1X1M1X,2M2I2M,3M1X;DP=97;DPB=112.25;DPRA=0,0,0;EPP=10.9724,5.80219,7.35324;EPPR=4.03217;GTI=0;LEN=4,2,1;MEANALT=3,3,3;MQM=60,43.4286,60;MQMR=59.5588;NS=1;NUMALT=3;ODDS=6.93147;PAIRED=0,0,0;PAIREDR=0;PAO=0.25,1.08333,0.583333;PQA=9.5,40.5,22.5;PQR=40.5;PRO=1.08333;QA=1160,941,76;QR=1258;RO=34;RPL…	GT:DP:RO:QR:AO:QA	0/0/1/1/2:97:34:1258:33,28,2:1160,941,76
vb1_example	482	.	TATTTTTTA	TATTTTTTTA,TTTTTTTTA,TATTTTTTT	2009.13	.	AB=0.6,0.341176,0.0470588;ABP=10.3933,21.6339,154.477;AC=4,1,0;AF=0.8,0.2,0;AN=5;AO=51,29,4;CIGAR=2M1I7M,1M1X7M,8M1X;DP=85;DPB=102.556;DPRA=0,0,0;EPP=4.07475,3.68421,3.0103;EPPR=0;GTI=0;LEN=1,1,1;MEANALT=4,4,4;MQM=59.7059,42.7931,60;MQMR=0;NS=1;NUMALT=3;ODDS=7.09511;PAIRED=0,0,0;PAIREDR=0;PAO=6.58333,2.25,4.58333;PQA=246.167,84.8333,169.833;PQR=246.167;PRO=6.58333;QA=1812,1008,148;QR=0;RO=0;RPL=2…	GT:DP:RO:QR:AO:QA	1/1/1/1/2:85:0:0:51,29,4:1812,1008,148
vb1_example	506	.	A	G	67.2067	.	AB=0.120879;ABP=116.619;AC=1;AF=0.2;AN=5;AO=11;CIGAR=1X;DP=91;DPB=91;DPRA=0;EPP=3.20771;EPPR=5.23675;GTI=0;LEN=1;MEANALT=2;MQM=40.0909;MQMR=55.7342;NS=1;NUMALT=1;ODDS=15.4749;PAIRED=0;PAIREDR=0;PAO=0;PQA=0;PQR=0;PRO=0;QA=379;QR=2474;RO=79;RPL=9;RPP=12.6832;RPPR=3.69747;RPR=2;RUN=1;SAF=6;SAP=3.20771;SAR=5;SRF=53;SRP=23.0483;SRR=26;TYPE=snp	GT:DP:RO:QR:AO:QA	0/0/0/0/1:91:79:2474:11:379
vb1_example	516	.	CTAT	GAAG	357.689	.	AB=0.30137;ABP=28.0269;AC=2;AF=0.4;AN=5;AO=22;CIGAR=2X1M1X;DP=73;DPB=74.25;DPRA=0;EPP=4.58955;EPPR=7.35324;GTI=0;LEN=4;MEANALT=2;MQM=52;MQMR=60;NS=1;NUMALT=1;ODDS=0.461757;PAIRED=0;PAIREDR=0;PAO=0;PQA=0;PQR=115;PRO=3;QA=755;QR=1752;RO=50;RPL=17;RPP=17.2236;RPPR=4.57376;RPR=5;RUN=1;SAF=14;SAP=6.56362;SAR=8;SRF=32;SRP=11.5225;SRR=18;TYPE=complex	GT:DP:RO:QR:AO:QA	0/0/0/1/1:73:50:1752:22:755
vb1_example	531	.	TT	GA	312.61	.	AB=0.27027;ABP=36.9322;AC=1;AF=0.2;AN=5;AO=20;CIGAR=2X;DP=74;DPB=75;DPRA=0;EPP=13.8677;EPPR=3.05127;GTI=0;LEN=2;MEANALT=2;MQM=52.5;MQMR=60;NS=1;NUMALT=1;ODDS=2.76841;PAIRED=0;PAIREDR=0;PAO=1;PQA=31;PQR=36;PRO=1;QA=671;QR=1851;RO=53;RPL=17;RPP=24.2907;RPPR=3.37904;RPR=3;RUN=1;SAF=12;SAP=4.74748;SAR=8;SRF=33;SRP=9.93443;SRR=20;TYPE=mnp	GT:DP:RO:QR:AO:QA	0/0/0/0/1:74:53:1851:20:671
vb1_example	535	.	GAAAAAAAAAAAT	GAAAAAAAAAAT,GAAAAAAAAAAAAT	495.74	.	AB=0.421875,0.15625;ABP=6.40323,68.6973;AC=1,1;AF=0.2,0.2;AN=5;AO=27,10;CIGAR=1M1D11M,1M1I12M;DP=64;DPB=78.7692;DPRA=0,0;EPP=9.52472,3.87889;EPPR=6.01695;GTI=0;LEN=1,1;MEANALT=3,3;MQM=58.7037,60;MQMR=57.5;NS=1;NUMALT=2;ODDS=6.59167;PAIRED=0,0;PAIREDR=0;PAO=7.66667,9.66667;PQA=269,337.5;PQR=337.5;PRO=9.66667;QA=926,316;QR=935;RO=26;RPL=15,5;RPP=3.73412,3.0103;RPPR=3.0103;RPR=12,5;RUN=1,1;SAF=15,7;…	GT:DP:RO:QR:AO:QA	0/0/0/1/2:64:26:935:27,10:926,316
vb1_example	550	.	GTAGACCG	ATAGACCA,GTAGACCT	516.661	.	AB=0.101449,0.246377;ABP=98.2089,41.5618;AC=1,1;AF=0.2,0.2;AN=5;AO=7,17;CIGAR=1X6M1X,7M1X;DP=69;DPB=79;DPRA=0,0;EPP=3.32051,24.5973;EPPR=3.79993;GTI=0;LEN=8,1;MEANALT=3,3;MQM=55,59.7059;MQMR=60;NS=1;NUMALT=2;ODDS=15.9466;PAIRED=0,0;PAIREDR=0;PAO=1,9.5;PQA=38,313;PQR=278;PRO=8.5;QA=246,626;QR=1493;RO=44;RPL=1,4;RPP=10.7656,13.3567;RPPR=6.16881;RPR=6,13;RUN=1,1;SAF=4,11;SAP=3.32051,6.20364;SAR=3,6;…	GT:DP:RO:QR:AO:QA	0/0/0/1/2:69:44:1493:7,17:246,626
vb1_example	636	.	AGAGCATTGCCAACAGCTGAACACATA	GGAGCATTGCCAACAACTGAACACATT,GGAGCATTGCCAACAACTGAACACATA,GGAGCATTACCAACAACTGAACACATT	1493.32	.	AB=0.620253,0.0506329,0.177215;ABP=12.9331,141.572,74.504;AC=3,0,1;AF=0.6,0,0.2;AN=5;AO=49,4,14;CIGAR=1X14M1X10M1X,1X14M1X11M,1X7M1X6M1X10M1X;DP=79;DPB=109.963;DPRA=0,0,0;EPP=3.40914,5.18177,3.0103;EPPR=4.09604;GTI=0;LEN=27,27,27;MEANALT=7,7,7;MQM=60,60,60;MQMR=60;NS=1;NUMALT=3;ODDS=30.0207;PAIRED=0,0,0;PAIREDR=0;PAO=26,13,16.5;PQA=944.667,433.667,594.667;PQR=231;PRO=6.5;QA=1767,155,527;QR=312;RO…	GT:DP:RO:QR:AO:QA	0/1/1/1/3:79:8:312:49,4,14:1767,155,527
vb1_example	678	.	G	A	1.10874e-08	.	AB=0.04;ABP=232.752;AC=1;AF=0.2;AN=5;AO=5;CIGAR=1X;DP=125;DPB=125;DPRA=0;EPP=3.44459;EPPR=3.66174;GTI=0;LEN=1;MEANALT=1;MQM=60;MQMR=60;NS=1;NUMALT=1;ODDS=19.786;PAIRED=0;PAIREDR=0;PAO=0;PQA=0;PQR=0;PRO=0;QA=185;QR=4411;RO=120;RPL=4;RPP=6.91895;RPPR=4.16842;RPR=1;RUN=1;SAF=2;SAP=3.44459;SAR=3;SRF=47;SRP=15.2429;SRR=73;TYPE=snp	GT:DP:RO:QR:AO:QA	0/0/0/0/1:125:120:4411:5:185
vb1_example	686	.	G	C	822.849	.	AB=0.293233;ABP=52.3991;AC=1;AF=0.2;AN=5;AO=39;CIGAR=1X;DP=133;DPB=133;DPRA=0;EPP=5.73856;EPPR=3.0103;GTI=0;LEN=1;MEANALT=1;MQM=60;MQMR=60;NS=1;NUMALT=1;ODDS=0.424215;PAIRED=0;PAIREDR=0;PAO=0;PQA=0;PQR=0;PRO=0;QA=1421;QR=3473;RO=94;RPL=10;RPP=23.1103;RPPR=3.37991;RPR=29;RUN=1;SAF=16;SAP=5.73856;SAR=23;SRF=42;SRP=5.32038;SRR=52;TYPE=snp	GT:DP:RO:QR:AO:QA	0/0/0/0/1:133:94:3473:39:1421
vb1_example	725	.	G	C	1333.51	.	AB=0.449153;ABP=5.66023;AC=2;AF=0.4;AN=5;AO=53;CIGAR=1X;DP=118;DPB=118;DPRA=0;EPP=7.96781;EPPR=4.64726;GTI=0;LEN=1;MEANALT=1;MQM=60;MQMR=60;NS=1;NUMALT=1;ODDS=9.73116;PAIRED=0;PAIREDR=0;PAO=0;PQA=0;PQR=0;PRO=0;QA=1952;QR=2449;RO=65;RPL=27;RPP=3.05127;RPPR=12.665;RPR=26;RUN=1;SAF=23;SAP=5.01789;SAR=30;SRF=29;SRP=4.64726;SRR=36;TYPE=snp	GT:DP:RO:QR:AO:QA	0/0/0/1/1:118:65:2449:53:1952
vb1_example	764	.	T	G	3704.6	.	AB=0.931818;ABP=216.802;AC=4;AF=0.8;AN=5;AO=123;CIGAR=1X;DP=132;DPB=132;DPRA=0;EPP=4.44029;EPPR=3.25157;GTI=0;LEN=1;MEANALT=1;MQM=60;MQMR=60;NS=1;NUMALT=1;ODDS=4.48663;PAIRED=0;PAIREDR=0;PAO=0;PQA=0;PQR=0;PRO=0;QA=4432;QR=319;RO=9;RPL=60;RPP=3.16919;RPPR=5.18177;RPR=63;RUN=1;SAF=62;SAP=3.02795;SAR=61;SRF=3;SRP=5.18177;SRR=6;TYPE=snp	GT:DP:RO:QR:AO:QA	0/1/1/1/1:132:9:319:123:4432

## Sheet: tcr_vb1_example.fa
>vb1_example Genbank_nucleotideID= EF554743.1 Genbank_proteinID=ABU93628.1 T cell receptor beta [Gallus gallus] Xia et al 2008
GTATCTTGCTTAGCGCAGAAATAAGTGCCTGAGTCATTGAGTAGGACGTGATCTATCACCACTGATAAGGATTTCTCCTTAGTCCCACTGCTTTGGAAGCGGCTTTTGAATTCTTCCTCAAACTCTGCTTTGCTACCTTCCACTGAACGAACAATCAGCTGCAAAGTGGCGTTCTTCCCCACTGGCAGCTTGTACCAGAACATGGTCCGGATTACACTCTCTTTGTCTGAACAGTTCAGAGTCAGAGAGTCTCCCAGTCGGACAATCATGTCTGGGGTTTGCTGAAGAGCCCAGCCTAGAAAAGGAAAGAAGAAAAGAAACTGTGAGGAATGGAATGAGTTGAAAGAGACACAGAGACACATCCTTGAATTAATAGATGGGATGCCAGCATGTCGGACG…
